# Supplementary material for: Survival of gastric cancer in China from 2000 to 2022: A nationwide systematic review of hospital-based studies
Source: PubMed Central journal article supplement (PMC9759711; doi:10.7189/jogh.12.11014), 2022-12-17
Supplement: jogh-12-11014-s001.pdf [file jogh-12-11014-s001.pdf]

## ONLINE SUPPLEMENTARY DOCUMENT

**Title:** Survival of gastric cancer in China from 2000 to 2022: A nationwide systematic review of hospital-based studies

**Authors:** Houqiang Li, Han Zhang, Hujia Zhang, Youxin Wang, Xiaobing Wang, Haifeng Hou

**Table S1** Checklist of PRISMA Statement

| Section/Topic             | Checklist Item                                                                                                                                                                                                                                                                                              | Reported or not |
|---------------------------|-------------------------------------------------------------------------------------------------------------------------------------------------------------------------------------------------------------------------------------------------------------------------------------------------------------|-----------------|
| TITLE                     |                                                                                                                                                                                                                                                                                                             |                 |
| Title                     | Identify the report as a systematic review, meta-analysis, or both.                                                                                                                                                                                                                                         | Y               |
| ABSTRACT                  |                                                                                                                                                                                                                                                                                                             |                 |
| Structured summary        | Provide a structured summary including, as applicable: background; objectives; data sources; study eligibility criteria, participants, and interventions; study appraisal and synthesis methods; results; limitations; conclusions and implications of key findings; systematic review registration number. | Y               |
| INTRODUCTION              |                                                                                                                                                                                                                                                                                                             |                 |
| Rationale                 | Describe the rationale for the review in the context of what is already known.                                                                                                                                                                                                                              | Y               |
| Objectives                | Provide an explicit statement of questions being addressed with reference to participants, interventions, comparisons, outcomes, and study design (PICOS).                                                                                                                                                  | Y               |
| METHODS                   |                                                                                                                                                                                                                                                                                                             |                 |
| Protocol and registration | Indicate if a review protocol exists, if and where it can be accessed (e.g., Web address), and, if available, provide registration information including registration number.                                                                                                                               | Y               |
| Eligibility criteria      | Specify study characteristics (e.g., PICOS, length of follow-up) and report characteristics (e.g., years considered, language, publication status) used as criteria for eligibility, giving rationale.                                                                                                      | Y               |
| Information sources       | Describe all information sources (e.g., databases with dates of coverage, contact with study authors to identify additional studies) in the search and date last searched.                                                                                                                                  | Y               |
| Search                    | Present full electronic search strategy for at least one database, including any limits used, such that it could be repeated.                                                                                                                                                                               | Y               |
| Study selection           | State the process for selecting studies (i.e., screening, eligibility, included in systematic review, and, if applicable, included in the                                                                                                                                                                   | Y               |

|                                    |                                                                                                                                                                                                                        |   |
|------------------------------------|------------------------------------------------------------------------------------------------------------------------------------------------------------------------------------------------------------------------|---|
|                                    | meta-analysis).                                                                                                                                                                                                        |   |
| Data collection process            | Describe method of data extraction from reports (e.g., piloted forms, independently, in duplicate) and any processes for obtaining and confirming data from investigators.                                             | Y |
| Data items                         | List and define all variables for which data were sought (e.g., PICOS, funding sources) and any assumptions and simplifications made.                                                                                  | Y |
| Risk of bias in individual studies | Describe methods used for assessing risk of bias of individual studies (including specification of whether this was done at the study or outcome level), and how this information is to be used in any data synthesis. | Y |
| Summary measures                   | State the principal summary measures (e.g., risk ratio, difference in means).                                                                                                                                          | Y |
| Synthesis of results               | Describe the methods of handling data and combining results of studies, if done, including measures of consistency (e.g., I <sup>2</sup> ) for each meta-analysis.                                                     | Y |
| Risk of bias across studies        | Specify any assessment of risk of bias that may affect the cumulative evidence (e.g., publication bias, selective reporting within studies).                                                                           | Y |
| Additional analyses                | Describe methods of additional analyses (e.g., sensitivity or subgroup analyses, meta-regression), if done, indicating which were pre-specified.                                                                       | Y |
| <b>RESULTS</b>                     |                                                                                                                                                                                                                        |   |
| Study selection                    | Give numbers of studies screened, assessed for eligibility, and included in the review, with reasons for exclusions at each stage, ideally with a flow diagram.                                                        | Y |
| Study characteristics              | For each study, present characteristics for which data were extracted (e.g., study size, PICOS, follow-up period) and provide the citations.                                                                           | Y |
| Risk of bias within studies        | Present data on risk of bias of each study and, if available, any outcome-level assessment (see Item 12).                                                                                                              | Y |
| Results of individual studies      | For all outcomes considered (benefits or harms), present, for each study: (a) simple summary data for each intervention group and (b) effect estimates and confidence intervals, ideally with a forest plot.           | Y |
| Synthesis of results               | Present results of each meta-analysis done, including confidence intervals and measures of consistency.                                                                                                                | Y |
| Risk of bias across studies        | Present results of any assessment of risk of bias across studies (see Item 15).                                                                                                                                        | Y |
| Additional analysis                | Give results of additional analyses, if done (e.g., sensitivity or subgroup analyses, meta-regression [see Item 16]).                                                                                                  | Y |
| <b>DISCUSSION</b>                  |                                                                                                                                                                                                                        |   |
| Summary of evidence                | Summarize the main findings including the strength of evidence for each main outcome; consider their relevance to key groups (e.g., health care providers, users, and policy makers).                                  | Y |

|             |                                                                                                                                                               |   |
|-------------|---------------------------------------------------------------------------------------------------------------------------------------------------------------|---|
| Limitations | Discuss limitations at study and outcome level (e.g., risk of bias), and at review level (e.g., incomplete retrieval of identified research, reporting bias). | Y |
| Conclusions | Provide a general interpretation of the results in the context of other evidence, and implications for future research.                                       | Y |
| FUNDING     |                                                                                                                                                               |   |
| Funding     | Describe sources of funding for the systematic review and other support (e.g., supply of data)                                                                | Y |

---

Y: the item was reported in article, N: the item was not reported.

**Table S2** Search strategy of systematic review

| Databases                | Search strategy                                                                                                                                                    | Numbers of studies |
|--------------------------|--------------------------------------------------------------------------------------------------------------------------------------------------------------------|--------------------|
| <b>English databases</b> |                                                                                                                                                                    |                    |
| PubMed                   | ((stomach neoplasms]) OR (gastric cancer) OR (gastric carcinoma) AND ((China) OR (Chinese)) AND (hospital) AND (survival)                                          | 10,175             |
| Embase                   | ('stomach neoplasms' OR 'stomach neoplasms' OR 'gastric cancer' OR 'gastric carcinoma') AND ('China' OR 'Chinese') AND ('hospital') AND ('survival' OR 'survival') | 12,443             |
| Web of science           | ((stomach neoplasms) OR (gastric cancer) OR (gastric carcinoma)) AND ((China) OR (Chinese)) AND (survival) AND (hospital))                                         | 9,980              |
| <b>Chinese databases</b> |                                                                                                                                                                    |                    |
| CNKI                     | 胃癌(gastric cancer) AND 生存(survival) AND 医院(hospital)                                                                                                               | 2,271              |
| Wanfang                  | 胃癌(gastric cancer) AND 生存(survival) AND 医院(hospital)                                                                                                               | 1,820              |

**Table S3** Scale for quality assessment

| <b>Criteria</b>                                                                                        | <b>Score</b> |
|--------------------------------------------------------------------------------------------------------|--------------|
| <b>Representativeness of cases</b>                                                                     |              |
| Characteristics of participants were described.                                                        | 1            |
| Consecutive/randomly selected from case population was clearly defined.                                | 1            |
| Eligible patients are similar to controls, in term of age, gender and other important characteristics. | 1            |
| The percentage of loss to follow-up was provided, or the reasons of loss to follow-up were mentioned.  | 1            |
| <b>Accuracy of information</b>                                                                         |              |
| Methods of variable measurement were offered                                                           | 1            |
| Definitions of outcome were offered.                                                                   | 1            |
| <b>Statistical analyses</b>                                                                            |              |
| Methods of statistical analyses were adequate to resolve research hypothesis.                          | 1            |
| Multivariate analyses were performed.                                                                  | 1            |
| <b>Final question</b>                                                                                  |              |
| If there were any other important flaws in the design, the study would be not included.                | 1            |

**Table S4** Characteristics of included studies

| No | Author   | Publication year | Areas            | Design | Quality score | Age  | Sample size | Male | Female | Language |
|----|----------|------------------|------------------|--------|---------------|------|-------------|------|--------|----------|
| 1  | Wu AW    | 2010             | Beijing          | R      | 6             | 58.8 | 2312        | 1633 | 679    | English  |
| 2  | Li C     | 2010             | Shanghai         | R      | 7             | 58.1 | 128         | 58   | 70     | English  |
| 3  | Qiu MZ   | 2011             | Guangdong        | R      | 7             | NA   | 1000        | 683  | 317    | English  |
| 4  | Ye YW    | 2011             | Shanghai         | R      | 8             | 49.7 | 162         | 89   | 73     | English  |
| 5  | Zhang H  | 2011             | Liaoning         | R      | 6             | NA   | 1604        | 1172 | 432    | English  |
| 6  | Li P     | 2012             | Zhejiang         | R      | 5             | 53   | 46          | 35   | 11     | English  |
| 7  | Li X     | 2013             | Tianjin          | R      | 7             | 54   | 162         | 90   | 72     | English  |
| 8  | Kong FM  | 2013             | Tianjin          | R      | 7             | 60.2 | 1296        | 966  | 330    | English  |
| 9  | Zhu Z    | 2014             | Liaoning         | R      | 7             | NA   | 932         | 669  | 263    | English  |
| 10 | Zeng WJ  | 2014             | Hubei            | R      | 7             | NA   | 533         | 389  | 144    | English  |
| 11 | Zhang WH | 2014             | Sichuan          | R      | 7             | 56.8 | 1654        | 1067 | 587    | English  |
| 12 | Wang J   | 2014             | Jiangsu          | R      | 6             | NA   | 605         | 438  | 167    | English  |
| 13 | Zhang JK | 2014             | Liaoning         | R      | 7             | NA   | 830         | 444  | 386    | English  |
| 14 | Sun XR   | 2015             | Liaoning         | R      | 7             | 59   | 265         | 194  | 71     | English  |
| 15 | Zheng XZ | 2015             | Jiangsu          | R      | 6             | NA   | 60          | NA   | NA     | English  |
| 16 | Wang W   | 2015             | Guangdong&Fujian | R      | 7             | 57.8 | 5327        | 3856 | 1471   | English  |
| 17 | Tang Z   | 2015             | Zhejiang         | R      | 6             | 59.8 | 165         | 124  | 41     | English  |
| 18 | Yang K   | 2016             | Sichuan          | R      | 7             | NA   | 1365        | 409  | 956    | English  |
| 19 | Sun HL   | 2017             | Jiangsu          | R      | 7             | 65.5 | 778         | 572  | 206    | English  |
| 20 | Anup S   | 2017             | Fujian           | R      | 7             | 57.2 | 132         | 94   | 38     | English  |
| 21 | Wang JF  | 2018             | Hebei            | R      | 7             | 63   | 128         | 99   | 29     | English  |
| 22 | Xue WJ   | 2018             | Shanghai         | R      | 7             | 63   | 197         | 129  | 68     | English  |
| 23 | Hu M     | 2018             | Sichuan          | R      | 6             | NA   | 164         | 121  | 43     | English  |
| 24 | Liu DH   | 2018             | Heilongjiang     | R      | 7             | 57   | 122         | 88   | 34     | English  |
| 25 | Gao YH   | 2019             | Beijing          | R      | 6             | 59.7 | 502         | 322  | 180    | English  |
| 26 | Shu P    | 2019             | Jiangsu          | R      | 6             | 58.5 | 489         | 358  | 131    | English  |
| 27 | Liang Y  | 2019             | Tianjin&Hainan   | R      | 7             | NA   | 2344        | 1667 | 677    | English  |
| 28 | Zhai Z   | 2020             | Heilongjiang     | R      | 7             | 58.6 | 4744        | 3502 | 1242   | English  |
| 29 | Lei T    | 2020             | Hunan            | R      | 6             | 55.3 | 177         | 92   | 85     | English  |
| 30 | Sheng LL | 2020             | Anhui            | R      | 6             | 60.2 | 299         | 205  | 94     | English  |
| 31 | Liu S    | 2020             | Beijing          | R      | 7             | 61.9 | 209         | 180  | 29     | English  |
| 32 | Tan YE   | 2020             | Liaoning         | R      | 6             | NA   | 3520        | 2566 | 954    | English  |
| 33 | Huang X  | 2021             | Guangxi          | P      | 6             | 57.7 | 161         | 104  | 57     | English  |
| 34 | Zhou LY  | 2021             | Henan            | R      | 6             | NA   | 99          | NA   | NA     | English  |
| 35 | Ren B    | 2000             | Zhejiang         | R      | 5             | NA   | 52          | 33   | 19     | Chinese  |
| 36 | Qi HL    | 2001             | Henan            | R      | 5             | NA   | 62          | 49   | 13     | Chinese  |
| 37 | Li Q     | 2001             | Tianjin          | R      | 7             | 48.9 | 81          | NA   | NA     | Chinese  |
| 38 | Shi H    | 2002             | Anhui            | R      | 8             | 55.4 | 281         | 198  | 83     | Chinese  |
| 39 | Huang J  | 2003             | Guangdong        | R      | 5             | NA   | 26          | 19   | 7      | Chinese  |

|    |          |      |              |   |   |      |     |     |     |         |
|----|----------|------|--------------|---|---|------|-----|-----|-----|---------|
| 40 | Che XM   | 2003 | Shaanxi      | R | 6 | 54.1 | 29  | 4   | 25  | Chinese |
| 41 | Fei BJ   | 2003 | Jiangsu      | R | 7 | 56.7 | 890 | 593 | 297 | Chinese |
| 42 | Yang MD  | 2004 | heilongjiang | R | 5 | 58   | 63  | 41  | 22  | Chinese |
| 43 | Guo H    | 2004 | Henan        | R | 5 | NA   | 40  | 32  | 8   | Chinese |
| 44 | Shi Y    | 2004 | Jilin        | P | 6 | 60.7 | 162 | 140 | 22  | Chinese |
| 45 | Li JW    | 2004 | Tianjin      | R | 6 | NA   | 814 | 605 | 209 | Chinese |
| 46 | Chen DL  | 2004 | Anhui        | R | 6 | NA   | 80  | 61  | 19  | Chinese |
| 47 | Lin G    | 2005 | Fujian       | R | 6 | NA   | 79  | 48  | 31  | Chinese |
| 48 | Yang WM  | 2005 | Guangdong    | R | 5 | NA   | 46  | NA  | NA  | Chinese |
| 49 | Chen SY  | 2005 | Shanghai     | R | 6 | 56   | 96  | 59  | 37  | Chinese |
| 50 | Yang QB  | 2005 | Liaoning     | R | 6 | 55.3 | 409 | 312 | 97  | Chinese |
| 51 | Zhang YQ | 2005 | Liaoning     | R | 6 | NA   | 209 | NA  | NA  | Chinese |
| 52 | Wang TM  | 2005 | Anhui        | R | 6 | NA   | 53  | NA  | NA  | Chinese |
| 53 | Chen BC  | 2005 | Hunan        | P | 5 | 51.7 | 110 | 72  | 38  | Chinese |
| 54 | Xu YP    | 2005 | Hebei        | R | 6 | NA   | 80  | 61  | 19  | Chinese |
| 55 | Li WS    | 2006 | Liaoning     | R | 7 | 54.9 | 51  | 37  | 14  | Chinese |
| 56 | Wang YZ  | 2006 | Fujian       | R | 7 | NA   | 98  | NA  | NA  | Chinese |
| 57 | Li YJ    | 2006 | Jilin        | R | 6 | 57   | 60  | 44  | 16  | Chinese |
| 58 | Quan XN  | 2006 | Jilin        | R | 6 | 57.5 | 50  | 42  | 8   | Chinese |
| 59 | Liu B    | 2007 | Liaoning     | R | 7 | 56.3 | 45  | 35  | 10  | Chinese |
| 60 | Liu WS   | 2007 | Shaanxi      | R | 5 | NA   | 97  | NA  | NA  | Chinese |
| 61 | Feng B   | 2007 | Shandong     | P | 5 | NA   | 50  | 24  | 26  | Chinese |
| 62 | Wang TM  | 2007 | Anhui        | R | 5 | NA   | 65  | NA  | NA  | Chinese |
| 63 | Jiang YM | 2007 | Guangdong    | R | 5 | 67.2 | 102 | 86  | 16  | Chinese |
| 64 | Xu Y     | 2007 | Shanghai     | R | 7 | NA   | 749 | 601 | 148 | Chinese |
| 65 | Wu DB    | 2008 | Guangdong    | R | 6 | NA   | 57  | NA  | NA  | Chinese |
| 66 | Wan H    | 2008 | Jiangsu      | P | 5 | NA   | 72  | NA  | NA  | Chinese |
| 67 | Liu SL   | 2008 | Shandong     | P | 6 | NA   | 65  | 36  | 29  | Chinese |
| 68 | Zhang Y  | 2008 | Liaoning     | R | 6 | NA   | 386 | 287 | 99  | Chinese |
| 69 | Zhang L  | 2008 | Shaanxi      | R | 6 | 50.5 | 428 | 329 | 99  | Chinese |
| 70 | You Z    | 2008 | Tianjin      | R | 5 | NA   | 69  | NA  | NA  | Chinese |
| 71 | Song XF  | 2008 | Liaoning     | R | 6 | 56.5 | 263 | 176 | 87  | Chinese |
| 72 | Wu WQ    | 2008 | Zhejiang     | R | 6 | 51.3 | 84  | 43  | 41  | Chinese |
| 73 | Zhang Y  | 2008 | ZheJiang     | R | 6 | 54.6 | 63  | 40  | 23  | Chinese |
| 74 | Lin T    | 2009 | Guangdong    | R | 6 | NA   | 122 | NA  | NA  | Chinese |
| 75 | Zhou LX  | 2009 | Zhejiang     | R | 6 | NA   | 81  | 62  | 19  | Chinese |
| 76 | Huang YH | 2009 | Yunnan       | R | 5 | NA   | 55  | NA  | NA  | Chinese |
| 77 | Liu DF   | 2009 | Guangdong    | R | 5 | NA   | 407 | NA  | NA  | Chinese |
| 78 | Luo Y    | 2009 | Jiangsu      | R | 5 | NA   | 39  | NA  | NA  | Chinese |
| 79 | Xu XY    | 2009 | Anhui        | R | 6 | NA   | 115 | NA  | NA  | Chinese |
| 80 | Wang C   | 2009 | Shanghai     | R | 6 | 56.2 | 459 | 305 | 154 | Chinese |
| 81 | Bai XF   | 2009 | Beijing      | P | 7 | 62   | 97  | 50  | 47  | Chinese |

|     |          |      |              |   |   |      |     |     |     |         |
|-----|----------|------|--------------|---|---|------|-----|-----|-----|---------|
| 82  | Liu FL   | 2009 | Shanghai     | P | 6 | NA   | 148 | 93  | 55  | Chinese |
| 83  | Ding XW  | 2009 | Tianjin      | P | 6 | NA   | 276 | 204 | 72  | Chinese |
| 84  | Xie YQ   | 2009 | Beijing      | R | 6 | NA   | 119 | 88  | 31  | Chinese |
| 85  | Jia ZS   | 2009 | Shandong     | R | 6 | 56.5 | 806 | 596 | 210 | Chinese |
| 86  | Mei D    | 2009 | Liaoning     | R | 7 | 58.3 | 791 | 573 | 218 | Chinese |
| 87  | Xiao ZL  | 2009 | Shanghai     | R | 6 | NA   | 78  | 52  | 26  | Chinese |
| 88  | Hong HJ  | 2009 | Guangdong    | R | 6 | 67.2 | 79  | 62  | 17  | Chinese |
| 89  | Xu DZ    | 2009 | Guangdong    | R | 7 | 60.2 | 906 | 609 | 297 | Chinese |
| 90  | Cai AZ   | 2010 | Beijing      | R | 6 | NA   | 121 | NA  | NA  | Chinese |
| 91  | Lin L    | 2010 | Fujian       | R | 5 | NA   | 36  | NA  | NA  | Chinese |
| 92  | Cao ND   | 2010 | Shanghai     | P | 5 | NA   | 88  | NA  | NA  | Chinese |
| 93  | Zhang H  | 2010 | Liaoning     | R | 7 | NA   | 256 | NA  | NA  | Chinese |
| 94  | Yu SF    | 2010 | Zhejiang     | R | 7 | NA   | 140 | NA  | NA  | Chinese |
| 95  | Zhang ZJ | 2010 | Zhejiang     | R | 5 | 55.6 | 90  | 63  | 27  | Chinese |
| 96  | Huang WL | 2010 | Jilin        | R | 5 | 69.5 | 40  | 31  | 9   | Chinese |
| 97  | Wang DY  | 2010 | Liaoning     | R | 5 | NA   | 42  | NA  | NA  | Chinese |
| 98  | Xue YW   | 2010 | heilongjiang | R | 7 | NA   | 630 | 480 | 150 | Chinese |
| 99  | Li XB    | 2010 | Shaanxi      | R | 7 | NA   | 934 | NA  | NA  | Chinese |
| 100 | Li SY    | 2010 | Beijing      | R | 7 | NA   | 45  | 26  | 19  | Chinese |
| 101 | Jiao ZK  | 2010 | Hebei        | R | 6 | 56.7 | 161 | 118 | 43  | Chinese |
| 102 | Chen J   | 2010 | Shanghai     | R | 6 | NA   | 431 | 316 | 115 | Chinese |
| 103 | Chen JH  | 2010 | Guangdong    | R | 7 | NA   | 419 | 283 | 136 | Chinese |
| 104 | Li XB    | 2010 | Shaanxi      | R | 7 | NA   | 934 | NA  | NA  | Chinese |
| 105 | Shi XR   | 2011 | Hubei        | R | 6 | 46.5 | 93  | 61  | 32  | Chinese |
| 106 | Zhao L   | 2011 | Shandong     | R | 7 | NA   | 86  | NA  | NA  | Chinese |
| 107 | Li L     | 2011 | Hebei        | R | 5 | NA   | 194 | NA  | NA  | Chinese |
| 108 | Peng G   | 2011 | Jiangxi      | P | 6 | NA   | 133 | 75  | 58  | Chinese |
| 109 | Chen PZ  | 2011 | Jiangsu      | R | 5 | NA   | 20  | 10  | 10  | Chinese |
| 110 | Li WH    | 2011 | Liaoning     | R | 6 | NA   | 146 | NA  | NA  | Chinese |
| 111 | Huang F  | 2011 | Fujian       | R | 7 | 56.3 | 112 | 68  | 44  | Chinese |
| 112 | Ma C     | 2011 | Henan        | R | 5 | 62.5 | 24  | 17  | 7   | Chinese |
| 113 | Tian BC  | 2011 | Shanxi       | R | 5 | NA   | 12  | NA  | NA  | Chinese |
| 114 | Ning ZF  | 2011 | Hubei        | R | 5 | 61.6 | 66  | 39  | 27  | Chinese |
| 115 | Meng LF  | 2011 | Zhejiang     | R | 5 | NA   | 32  | NA  | NA  | Chinese |
| 116 | Luo CY   | 2011 | Guangdong    | P | 6 | 65.3 | 174 | 121 | 53  | Chinese |
| 117 | Zhang JF | 2011 | Henan        | R | 6 | 53.7 | 120 | 67  | 53  | Chinese |
| 118 | Lin HD   | 2011 | Guangxi      | R | 5 | NA   | 53  | NA  | NA  | Chinese |
| 119 | Zhou B   | 2011 | Hunan        | R | 5 | 56.3 | 116 | 86  | 30  | Chinese |
| 120 | Yang M   | 2011 | heilongjiang | R | 5 | NA   | 946 | NA  | NA  | Chinese |
| 121 | Shen CL  | 2011 | Shanghai     | R | 6 | NA   | 135 | 89  | 46  | Chinese |
| 122 | Yu ZY    | 2011 | Shandong     | R | 5 | NA   | 121 | NA  | NA  | Chinese |
| 123 | Yu YS    | 2011 | Jiangsu      | P | 6 | 53.8 | 74  | 46  | 28  | Chinese |



|     |          |      |           |   |   |      |      |     |     |         |
|-----|----------|------|-----------|---|---|------|------|-----|-----|---------|
| 124 | Zhang ML | 2011 | Jiangsu   | R | 7 | NA   | 489  | 359 | 130 | Chinese |
| 125 | Yang ZJ  | 2011 | Hebei     | R | 7 | NA   | 80   | 52  | 28  | Chinese |
| 126 | Zhu GY   | 2011 | Zhejiang  | R | 5 | NA   | 206  | 142 | 64  | Chinese |
| 127 | Ma XM    | 2011 | Liaoning  | R | 6 | NA   | 843  | NA  | NA  | Chinese |
| 128 | Jiang ZH | 2012 | Jiangxi   | P | 6 | 51.2 | 60   | 39  | 21  | Chinese |
| 129 | Guo YQ   | 2012 | Liaoning  | R | 7 | NA   | 550  | NA  | NA  | Chinese |
| 130 | Wang J   | 2012 | Shanghai  | R | 7 | NA   | 606  | 406 | 200 | Chinese |
| 131 | Wang B   | 2012 | Jiangsu   | R | 7 | 64   | 351  | 252 | 99  | Chinese |
| 132 | Ge YP    | 2012 | Beijing   | P | 6 | NA   | 44   | 30  | 14  | Chinese |
| 133 | Wang JL  | 2012 | Liaoning  | P | 5 | 64.4 | 64   | 41  | 23  | Chinese |
| 134 | Wu J     | 2012 | Jiangsu   | P | 6 | NA   | 80   | NA  | NA  | Chinese |
| 135 | Xu X     | 2012 | Jiangxi   | R | 6 | NA   | 68   | NA  | NA  | Chinese |
| 136 | Lin Z    | 2012 | Guangxi   | P | 7 | NA   | 80   | 49  | 31  | Chinese |
| 137 | Liu R    | 2012 | Beijing   | R | 6 | NA   | 88   | 67  | 21  | Chinese |
| 138 | Wu CF    | 2012 | Henan     | R | 6 | NA   | 260  | NA  | NA  | Chinese |
| 139 | Liu JZ   | 2012 | Shanghai  | R | 6 | 61.7 | 153  | 97  | 56  | Chinese |
| 140 | Liu SW   | 2012 | Hebei     | R | 6 | NA   | 387  | 333 | 54  | Chinese |
| 141 | Zhao YZ  | 2012 | Henan     | R | 6 | NA   | 193  | NA  | NA  | Chinese |
| 142 | Guo CY   | 2013 | Shaanxi   | R | 6 | 58.6 | 66   | 50  | 16  | Chinese |
| 143 | Hong LQ  | 2013 | Fujian    | R | 6 | 59.2 | 32   | 25  | 7   | Chinese |
| 144 | Hu JH    | 2013 | Henan     | P | 7 | NA   | 84   | NA  | NA  | Chinese |
| 145 | Lai JJ   | 2013 | Guangdong | R | 5 | NA   | 104  | 63  | 41  | Chinese |
| 146 | Zhang LT | 2013 | Anhui     | P | 6 | NA   | 82   | 39  | 43  | Chinese |
| 147 | Zhang WN | 2013 | Shaanxi   | R | 5 | NA   | 56   | 32  | 24  | Chinese |
| 148 | Zhang YF | 2013 | Guangxi   | P | 5 | NA   | 86   | 59  | 27  | Chinese |
| 149 | He YJ    | 2013 | Hunan     | R | 7 | NA   | 89   | 53  | 36  | Chinese |
| 150 | Lin T    | 2013 | Shaanxi   | R | 6 | NA   | 200  | 141 | 59  | Chinese |
| 151 | Du BB    | 2013 | Liaoning  | R | 6 | 60.6 | 112  | 69  | 43  | Chinese |
| 152 | Lei Y    | 2013 | Beijing   | R | 5 | 58.5 | 75   | 54  | 21  | Chinese |
| 153 | Ma YH    | 2013 | Xinjiang  | R | 7 | NA   | 164  | 129 | 35  | Chinese |
| 154 | Li Y     | 2013 | Guangdong | R | 6 | 65.1 | 41   | 37  | 4   | Chinese |
| 155 | Gong HJ  | 2013 | Shanghai  | R | 7 | 60.2 | 151  | 105 | 46  | Chinese |
| 156 | Shan LQ  | 2013 | Jiangsu   | R | 7 | NA   | 1451 | 996 | 455 | Chinese |
| 157 | Huang JQ | 2014 | Guangdong | R | 6 | 57.1 | 85   | 47  | 38  | Chinese |
| 158 | Chen w   | 2014 | Zhejiang  | R | 5 | NA   | 21   | NA  | NA  | Chinese |
| 159 | Wang ZY  | 2014 | Jiangxi   | R | 7 | NA   | 126  | NA  | NA  | Chinese |
| 160 | Zhang CL | 2014 | Henan     | R | 5 | NA   | 12   | NA  | NA  | Chinese |
| 161 | Su Y     | 2014 | Jiangxi   | P | 6 | NA   | 120  | 64  | 56  | Chinese |
| 162 | Li Y;    | 2014 | Shanghai  | R | 6 | NA   | 209  | NA  | NA  | Chinese |
| 163 | He XW    | 2014 | Zhejiang  | P | 6 | NA   | 60   | 38  | 22  | Chinese |
| 164 | Tang SZ  | 2014 | Hunan     | R | 6 | NA   | 62   | 43  | 19  | Chinese |
| 165 | Li S;    | 2014 | Henan     | P | 7 | NA   | 166  | 87  | 79  | Chinese |

|     |          |      |           |   |   |      |     |     |     |         |
|-----|----------|------|-----------|---|---|------|-----|-----|-----|---------|
| 166 | Huang FS | 2014 | Guangxi   | R | 6 | 68.2 | 38  | 22  | 16  | Chinese |
| 167 | Shi YJ   | 2014 | Guangdong | R | 5 | 59.7 | 35  | 18  | 17  | Chinese |
| 168 | Geng XW  | 2014 | Hunan     | R | 7 | 47.9 | 94  | 61  | 33  | Chinese |
| 169 | Ren ZJ   | 2014 | Hunan     | R | 6 | NA   | 50  | 33  | 17  | Chinese |
| 170 | Zhao DY  | 2014 | Tianjin   | R | 6 | 65.7 | 60  | 46  | 14  | Chinese |
| 171 | Yan L    | 2014 | Henan     | P | 7 | NA   | 86  | NA  | NA  | Chinese |
| 172 | Li MZ    | 2014 | Hubei     | P | 6 | NA   | 92  | 54  | 38  | Chinese |
| 173 | Dong L   | 2014 | Jiangxi   | R | 6 | NA   | 76  | NA  | NA  | Chinese |
| 174 | Chai JH  | 2014 | Henan     | R | 6 | NA   | 300 | 218 | 82  | Chinese |
| 175 | Zhang J  | 2014 | Henan     | R | 6 | NA   | 143 | 91  | 52  | Chinese |
| 176 | Li SZ    | 2014 | Jilin     | R | 6 | 61   | 108 | 78  | 30  | Chinese |
| 177 | Huang ZQ | 2014 | Fujian    | R | 7 | NA   | 216 | 137 | 79  | Chinese |
| 178 | Zhang C  | 2014 | Ningxia   | P | 6 | NA   | 57  | 41  | 16  | Chinese |
| 179 | Wei YL   | 2014 | Sichuan   | P | 6 | 41   | 60  | 31  | 29  | Chinese |
| 180 | Liu SP   | 2015 | Hainan    | P | 7 | 48.7 | 160 | 108 | 52  | Chinese |
| 181 | Zhou H   | 2015 | Shandong  | P | 6 | NA   | 52  | NA  | NA  | Chinese |
| 182 | Zhang W  | 2015 | Beijing   | R | 7 | NA   | 130 | NA  | NA  | Chinese |
| 183 | Wang LJ  | 2015 | Beijing   | R | 6 | NA   | 178 | 127 | 51  | Chinese |
| 184 | Kang Y   | 2015 | Shanxi    | P | 6 | 58.7 | 160 | 98  | 62  | Chinese |
| 185 | Zhao Y   | 2015 | Sichuan   | R | 5 | NA   | 38  | NA  | NA  | Chinese |
| 186 | Qiao SF  | 2015 | Liaoning  | R | 7 | NA   | 86  | 67  | 19  | Chinese |
| 187 | Wang YF  | 2015 | Hebei     | P | 6 | 59   | 207 | 158 | 49  | Chinese |
| 188 | Zhong JC | 2015 | Jiangsu   | P | 6 | NA   | 60  | 40  | 20  | Chinese |
| 189 | Tian L   | 2015 | Shanghai  | R | 6 | NA   | 85  | 69  | 16  | Chinese |
| 190 | Lu G     | 2015 | Beijing   | P | 6 | NA   | 72  | 43  | 29  | Chinese |
| 191 | Luo ZM   | 2015 | Henan     | P | 7 | NA   | 161 | NA  | NA  | Chinese |
| 192 | Wang Z   | 2015 | Jiangxi   | P | 7 | 43.5 | 80  | 54  | 26  | Chinese |
| 193 | Yang XA  | 2015 | Henan     | R | 5 | 74   | 36  | 28  | 8   | Chinese |
| 194 | Di YC    | 2015 | Henan     | P | 6 | 45.7 | 60  | 37  | 23  | Chinese |
| 195 | Liu RQ   | 2015 | Fujian    | P | 5 | 49.2 | 167 | 96  | 71  | Chinese |
| 196 | Shen NY  | 2015 | Shaanxi   | P | 7 | NA   | 140 | 64  | 76  | Chinese |
| 197 | Jin J    | 2015 | Hebei     | P | 6 | NA   | 80  | 47  | 33  | Chinese |
| 198 | Ni SM    | 2015 | Zhejiang  | P | 6 | NA   | 66  | 43  | 23  | Chinese |
| 199 | Zhou N   | 2015 | Xinjiang  | P | 7 | NA   | 60  | 34  | 26  | Chinese |
| 200 | Liu YP   | 2015 | Hunan     | P | 7 | NA   | 120 | 59  | 61  | Chinese |
| 201 | Zhu HT   | 2015 | Liaoning  | R | 7 | NA   | 106 | 74  | 32  | Chinese |
| 202 | Hou Z    | 2015 | Liaoning  | P | 6 | NA   | 50  | 31  | 19  | Chinese |
| 203 | Dong SJ  | 2015 | Hebei     | P | 7 | NA   | 128 | 75  | 53  | Chinese |
| 204 | Peng JJ  | 2015 | Guangdong | R | 7 | 57   | 942 | 650 | 292 | Chinese |
| 205 | Cui JG   | 2015 | Tianjin   | R | 7 | NA   | 300 | 217 | 83  | Chinese |
| 206 | Zhang Y  | 2015 | Shandong  | P | 7 | NA   | 76  | NA  | NA  | Chinese |
| 207 | Zhang S  | 2015 | Beijing   | R | 6 | NA   | 504 | 387 | 117 | Chinese |

|     |          |      |                |   |   |      |      |      |     |         |
|-----|----------|------|----------------|---|---|------|------|------|-----|---------|
| 208 | Zhong HQ | 2015 | Jiangxi        | R | 6 | NA   | 97   | 65   | 32  | Chinese |
| 209 | Liang XY | 2016 | HeiLongJiang   | P | 6 | 72.9 | 86   | 59   | 27  | Chinese |
| 210 | Zhou X   | 2016 | Sichuan        | P | 7 | 54   | 186  | 102  | 84  | Chinese |
| 211 | Zhang XT | 2016 | Shandong       | P | 7 | NA   | 126  | 78   | 48  | Chinese |
| 212 | Wu B     | 2018 | Ningxia        | R | 6 | 30.5 | 368  | 255  | 113 | Chinese |
| 213 | Jian JL  | 2019 | Fujian         | R | 6 | 59   | 984  | 704  | 280 | Chinese |
| 214 | Zhan YB  | 2019 | Shanghai       | P | 5 | 63.8 | 106  | 59   | 47  | Chinese |
| 215 | Sun JG   | 2019 | Shanxi&Shaanxi | P | 6 | 56.5 | 60   | 36   | 24  | Chinese |
| 216 | Jiao JG  | 2019 | Shandong       | P | 6 | NA   | 95   | NA   | NA  | Chinese |
| 217 | Zhou H   | 2019 | Jiangsu        | P | 6 | 51.8 | 60   | 36   | 24  | Chinese |
| 218 | Zhang K  | 2019 | Hunan          | R | 6 | 45.8 | 84   | 46   | 38  | Chinese |
| 219 | Zhen Y   | 2019 | Fujian         | P | 7 | NA   | 101  | NA   | NA  | Chinese |
| 220 | Qin RF   | 2019 | Hebei          | P | 6 | 58.3 | 80   | 49   | 31  | Chinese |
| 221 | Mo L     | 2019 | Guangxi        | P | 6 | 63.4 | 100  | 57   | 43  | Chinese |
| 222 | Zhang ZH | 2019 | Hubei          | P | 7 | 49.9 | 76   | 56   | 20  | Chinese |
| 223 | Li ZH    | 2019 | Zhejiang       | R | 5 | 63.2 | 100  | 59   | 41  | Chinese |
| 224 | Dai B    | 2019 | Henan          | P | 7 | 62.4 | 109  | 52   | 57  | Chinese |
| 225 | Shi Y    | 2019 | Anhui          | P | 6 | 58.4 | 68   | 39   | 27  | Chinese |
| 226 | Wu K     | 2019 | Guangdong      | P | 7 | 63.8 | 88   | 60   | 28  | Chinese |
| 227 | Xiao Y   | 2019 | Shandong       | P | 7 | NA   | 102  | 47   | 55  | Chinese |
| 228 | Qiu F    | 2019 | Sichuan        | R | 6 | 56.5 | 81   | 45   | 36  | Chinese |
| 229 | Qiao B   | 2019 | Sichuan        | P | 5 | 58.1 | 62   | 38   | 24  | Chinese |
| 230 | Qi XY    | 2019 | Anhui          | P | 7 | NA   | 284  | 211  | 73  | Chinese |
| 231 | Zhang GL | 2019 | Hubei          | P | 6 | 59.8 | 70   | 45   | 25  | Chinese |
| 232 | Xu Y     | 2019 | Anhui          | P | 5 | 55.8 | 120  | 74   | 46  | Chinese |
| 233 | Zhang GZ | 2019 | Anhui          | P | 7 | 46   | 78   | 46   | 32  | Chinese |
| 234 | Zhao GC  | 2019 | Jilin          | P | 7 | 56.9 | 100  | 62   | 38  | Chinese |
| 235 | Chen ZH  | 2019 | Guangxi        | P | 7 | NA   | 90   | 49   | 41  | Chinese |
| 236 | Sun X;   | 2019 | Anhui          | R | 6 | NA   | 286  | 192  | 94  | Chinese |
| 237 | Wang G;  | 2019 | Qinghai        | R | 6 | 61.6 | 102  | 88   | 14  | Chinese |
| 238 | Gao P    | 2019 | Jiangxi        | R | 7 | NA   | 101  | 68   | 33  | Chinese |
| 239 | Zhang P  | 2019 | Henan          | R | 6 | NA   | 231  | 132  | 99  | Chinese |
| 240 | Chen J;  | 2019 | Shaanxi        | R | 6 | 58.3 | 1973 | 1478 | 495 | Chinese |
| 241 | Jia YX   | 2019 | Henan          | R | 6 | NA   | 107  | 72   | 35  | Chinese |
| 242 | Mai MT   | 2019 | Xinjiang       | R | 7 | NA   | 118  | 93   | 25  | Chinese |
| 243 | Li YL    | 2019 | Fujian         | R | 6 | NA   | 341  | NA   | NA  | Chinese |
| 244 | Bao GJ   | 2019 | Shanghai       | P | 6 | 56.2 | 102  | 72   | 30  | Chinese |
| 245 | Long M   | 2019 | Jiangxi        | R | 6 | NA   | 62   | 31   | 31  | Chinese |
| 246 | Song JF  | 2019 | Hainan         | P | 6 | NA   | 93   | 70   | 23  | Chinese |
| 247 | Liu JF   | 2019 | Hebei          | R | 6 | NA   | 57   | NA   | NA  | Chinese |
| 248 | Wang X;  | 2019 | Shanxi         | R | 6 | NA   | 236  | 138  | 98  | Chinese |
| 249 | Xu Y     | 2019 | Beijing        | R | 6 | NA   | 120  | 65   | 55  | Chinese |

|     |          |      |           |   |   |      |      |      |      |         |
|-----|----------|------|-----------|---|---|------|------|------|------|---------|
| 250 | Zhang Y  | 2019 | Gansu     | R | 6 | NA   | 63   | 43   | 20   | Chinese |
| 251 | Bu LB    | 2019 | Xinjiang  | P | 6 | NA   | 80   | 51   | 29   | Chinese |
| 252 | Ye ZJ    | 2019 | Guangdong | R | 7 | 69   | 200  | 139  | 61   | Chinese |
| 253 | Wu YC    | 2019 | Beijing   | R | 7 | NA   | 178  | 122  | 56   | Chinese |
| 254 | Ji ZH    | 2019 | Beijing   | R | 7 | NA   | 115  | 56   | 59   | Chinese |
| 255 | Wang ZH  | 2019 | Sichuan   | R | 6 | NA   | 70   | NA   | NA   | Chinese |
| 256 | Guo LY   | 2019 | Hebei     | R | 6 | NA   | 157  | 130  | 27   | Chinese |
| 257 | Zhang MM | 2019 | Shandong  | R | 6 | NA   | 78   | 55   | 23   | Chinese |
| 258 | Wang RH  | 2019 | Xinjiang  | R | 6 | NA   | 196  | 139  | 57   | Chinese |
| 259 | Zhang CY | 2019 | Guizhou   | R | 6 | NA   | 86   | 67   | 19   | Chinese |
| 260 | Chen JJ  | 2019 | Jiangsu   | R | 6 | NA   | 50   | 30   | 20   | Chinese |
| 261 | He YX    | 2019 | Shaanxi   | R | 6 | 58.4 | 667  | 515  | 152  | Chinese |
| 262 | Nie HY   | 2019 | Liaoning  | R | 7 | NA   | 153  | NA   | NA   | Chinese |
| 263 | Chen Q;  | 2019 | Fujian    | R | 5 | 45   | 40   | NA   | NA   | Chinese |
| 264 | Zhang YY | 2019 | Zhejiang  | R | 6 | NA   | 194  | 137  | 57   | Chinese |
| 265 | Zheng JY | 2019 | Fujian    | R | 6 | 57.4 | 25   | 19   | 6    | Chinese |
| 266 | Liu YN   | 2019 | Henan     | R | 6 | 59.2 | 210  | 145  | 65   | Chinese |
| 267 | Hou JP   | 2019 | Henan     | R | 7 | NA   | 84   | 49   | 34   | Chinese |
| 268 | Dai XC   | 2019 | Jiangsu   | P | 6 | NA   | 86   | 56   | 30   | Chinese |
| 269 | Li H;    | 2019 | Zhejiang  | R | 7 | NA   | 80   | NA   | NA   | Chinese |
| 270 | Chen W;  | 2019 | Jiangsu   | R | 6 | NA   | 113  | 72   | 41   | Chinese |
| 271 | Bao Y;   | 2019 | Anhui     | R | 6 | NA   | 97   | 57   | 40   | Chinese |
| 272 | Shen YF  | 2019 | Jiangsu   | R | 6 | NA   | 49   | 32   | 17   | Chinese |
| 273 | Zou ZL   | 2019 | Jiangsu   | P | 6 | 63.9 | 60   | 37   | 23   | Chinese |
| 274 | Li TJ    | 2019 | Yunnan    | R | 5 | NA   | 42   | 20   | 22   | Chinese |
| 275 | Wang KW  | 2019 | Guangdong | R | 6 | 55.8 | 402  | 276  | 126  | Chinese |
| 276 | Yang LP  | 2020 | Gansu     | R | 7 | 57   | 107  | 61   | 46   | Chinese |
| 277 | Ming R   | 2020 | Sichuan   | P | 7 | NA   | 68   | 52   | 16   | Chinese |
| 278 | Wang Y   | 2020 | Shaanxi   | P | 7 | NA   | 110  | 70   | 40   | Chinese |
| 279 | Feng Y   | 2020 | Guangdong | R | 5 | 58.1 | 53   | 31   | 22   | Chinese |
| 280 | Gong YB  | 2020 | Liaoning  | R | 7 | NA   | 2522 | 1846 | 676  | Chinese |
| 281 | Zhang W  | 2020 | Beijing   | R | 8 | NA   | 52   | NA   | NA   | Chinese |
| 282 | Guo XD   | 2020 | Shanghai  | P | 5 | NA   | 77   | 47   | 30   | Chinese |
| 283 | Xu QL    | 2020 | Shaanxi   | P | 6 | 59.8 | 110  | 64   | 46   | Chinese |
| 284 | Ding PA  | 2020 | Hebei     | P | 7 | NA   | 225  | 162  | 63   | Chinese |
| 285 | Gu JB    | 2020 | Henan     | P | 7 | 62   | 98   | 64   | 34   | Chinese |
| 286 | Zhan HJ  | 2020 | Tianjin   | R | 6 | 59.5 | 170  | 90   | 80   | Chinese |
| 287 | Zhang WH | 2020 | Sichuan   | P | 8 | NA   | 4516 | 3183 | 1333 | Chinese |
| 288 | Liang WQ | 2020 | Beijing   | R | 5 | NA   | 3431 | NA   | NA   | Chinese |
| 289 | Guo J    | 2020 | Hebei     | P | 5 | 65   | 60   | 31   | 29   | Chinese |
| 290 | Sun YC   | 2020 | Henan     | P | 7 | 60   | 86   | 47   | 39   | Chinese |
| 291 | Ding PA  | 2020 | Hebei     | R | 7 | NA   | 476  | NA   | NA   | Chinese |

|     |          |      |              |   |   |      |      |     |     |         |
|-----|----------|------|--------------|---|---|------|------|-----|-----|---------|
| 292 | Sheng LL | 2020 | Anhui        | P | 5 | NA   | 216  | 118 | 98  | Chinese |
| 293 | Zhai Z   | 2020 | Heilongjiang | R | 7 | NA   | 625  | 433 | 192 | Chinese |
| 294 | Sha JP   | 2020 | Henan        | P | 7 | NA   | 116  | 78  | 38  | Chinese |
| 295 | Ding PA  | 2020 | Hebei        | R | 7 | NA   | 104  | NA  | NA  | Chinese |
| 296 | Dong TT  | 2020 | Jiangsu      | R | 7 | 62.3 | 391  | 112 | 279 | Chinese |
| 297 | Han WF   | 2020 | Gansu        | R | 7 | 71   | 216  | 166 | 50  | Chinese |
| 298 | Han BL   | 2020 | Heilongjiang | R | 7 | NA   | 891  | 649 | 242 | Chinese |
| 299 | Liu XC   | 2020 | Beijing      | R | 5 | 59.8 | 60   | 47  | 13  | Chinese |
| 300 | Ding PA  | 2020 | Hebei        | R | 7 | NA   | 2273 | NA  | NA  | Chinese |
| 301 | Zhao XL  | 2020 | Beijing      | P | 6 | NA   | 116  | NA  | NA  | Chinese |
| 302 | Zhu Y    | 2020 | Hubei        | R | 7 | NA   | 390  | NA  | NA  | Chinese |
| 303 | Wu YH    | 2020 | Jiangsu      | R | 7 | NA   | 72   | 55  | 17  | Chinese |
| 304 | Han T    | 2020 | Tianjin      | P | 5 | 57.7 | 481  | 314 | 167 | Chinese |
| 305 | Wu J     | 2020 | Anhui        | P | 7 | NA   | 98   | NA  | NA  | Chinese |
| 306 | Zhou M   | 2020 | Hebei        | R | 6 | 56.3 | 118  | 83  | 35  | Chinese |
| 307 | Zhang XL | 2020 | Sichuan      | R | 6 | NA   | 120  | 72  | 48  | Chinese |
| 308 | Yin F    | 2020 | Yunnan       | R | 6 | 59.8 | 157  | 103 | 54  | Chinese |
| 309 | Yi YJ    | 2020 | Sichuan      | P | 7 | 58.3 | 103  | 49  | 54  | Chinese |
| 310 | Zhu ZY   | 2020 | Heilongjiang | R | 7 | NA   | 645  | 418 | 227 | Chinese |
| 311 | Jiang TP | 2020 | Anhui        | P | 6 | 50.2 | 200  | 123 | 77  | Chinese |
| 312 | Yang JQ  | 2020 | Chongqing    | P | 6 | 64.7 | 500  | 274 | 226 | Chinese |
| 313 | Peng M   | 2020 | Sichuan      | P | 6 | 54.4 | 78   | 44  | 34  | Chinese |
| 314 | Guo J    | 2020 | Henan        | P | 6 | 60.7 | 101  | 78  | 23  | Chinese |
| 315 | Zhang XP | 2020 | Shandong     | P | 7 | 59.2 | 597  | 342 | 255 | Chinese |
| 316 | Sun HX   | 2020 | Sichuan      | P | 6 | NA   | 128  | NA  | NA  | Chinese |
| 317 | Chen L   | 2020 | Hunan        | P | 6 | NA   | 105  | NA  | NA  | Chinese |
| 318 | Qian XL  | 2020 | Jiangsu      | P | 7 | NA   | 102  | 79  | 23  | Chinese |
| 319 | Zheng T  | 2020 | Hebei        | P | 6 | 57.1 | 48   | 35  | 13  | Chinese |
| 320 | Liu JT   | 2020 | Jiangsu      | R | 6 | 63.5 | 713  | 531 | 182 | Chinese |
| 321 | Pan H    | 2020 | Guizhou      | R | 6 | NA   | 231  | 150 | 81  | Chinese |
| 322 | Zhu QT   | 2020 | Zhejiang     | R | 6 | NA   | 245  | 176 | 69  | Chinese |
| 323 | Guo JB   | 2020 | Jiangsu      | R | 6 | 65   | 160  | 120 | 40  | Chinese |
| 324 | Shi YC   | 2020 | Shaanxi      | P | 7 | NA   | 432  | 347 | 85  | Chinese |
| 325 | Duan ZX  | 2020 | Henan        | R | 6 | NA   | 68   | 56  | 12  | Chinese |
| 326 | LU GJ    | 2020 | Shandong     | P | 6 | NA   | 528  | 359 | 169 | Chinese |
| 327 | Wang H   | 2020 | Zhejiang     | P | 7 | NA   | 466  | 327 | 139 | Chinese |
| 328 | Zhang QR | 2020 | Beijing      | R | 6 | 59.3 | 122  | 75  | 47  | Chinese |
| 329 | Wu JF    | 2020 | Zhejiang     | R | 6 | 62.4 | 87   | 63  | 24  | Chinese |
| 330 | Tan J    | 2020 | Shaanxi      | R | 6 | NA   | 623  | NA  | NA  | Chinese |
| 331 | Hao K    | 2020 | Shandong     | P | 6 | 57.4 | 368  | 187 | 181 | Chinese |
| 332 | Shen S   | 2020 | Shandong     | P | 6 | 58.9 | 566  | 419 | 147 | Chinese |
| 333 | Li Y     | 2020 | Liaoning     | R | 6 | 59.3 | 158  | 114 | 44  | Chinese |

|     |          |      |           |   |   |      |      |     |     |         |
|-----|----------|------|-----------|---|---|------|------|-----|-----|---------|
| 334 | Pan GF   | 2020 | Fujian    | P | 7 | 54.1 | 70   | 41  | 29  | Chinese |
| 335 | Chen H   | 2020 | Jiangsu   | R | 6 | NA   | 221  | 163 | 58  | Chinese |
| 336 | Chen TY  | 2020 | Guangdong | P | 6 | 65.2 | 132  | 81  | 51  | Chinese |
| 337 | Jiao HD  | 2020 | Henan     | P | 7 | 54.3 | 150  | 81  | 69  | Chinese |
| 338 | Hou Y    | 2020 | Jiangsu   | P | 6 | 66   | 90   | 49  | 41  | Chinese |
| 339 | Liao H   | 2020 | Shanghai  | P | 6 | 46   | 128  | 99  | 29  | Chinese |
| 340 | Yuan GF  | 2020 | Jiangsu   | P | 7 | 57.4 | 68   | 41  | 27  | Chinese |
| 341 | Liu Y    | 2020 | Henan     | P | 6 | 62.9 | 86   | 31  | 55  | Chinese |
| 342 | Chen ZQ  | 2020 | Henan     | P | 5 | 50.4 | 72   | 41  | 31  | Chinese |
| 343 | Zhao Y   | 2020 | Liaoning  | R | 7 | 63   | 194  | 142 | 52  | Chinese |
| 344 | Guo YH   | 2020 | Shaanxi   | P | 7 | 54.6 | 46   | 27  | 19  | Chinese |
| 345 | Yuan Q   | 2020 | Gansu     | P | 6 | 59.9 | 90   | 51  | 39  | Chinese |
| 346 | Liu XF   | 2020 | Hebei     | P | 7 | NA   | 79   | NA  | NA  | Chinese |
| 347 | Liu J    | 2020 | Qinghai   | P | 6 | 53   | 30   | 19  | 11  | Chinese |
| 348 | Wang DJ  | 2020 | Jiangsu   | P | 7 | 58.2 | 66   | 37  | 29  | Chinese |
| 349 | Zhang L  | 2020 | Shaanxi   | R | 7 | 57.9 | 720  | 543 | 177 | Chinese |
| 350 | Cui YF   | 2020 | Shanxi    | R | 6 | 59.1 | 158  | 91  | 67  | Chinese |
| 351 | Wu MH    | 2020 | Jilin     | R | 6 | 60.5 | 842  | 629 | 213 | Chinese |
| 352 | Yu Y     | 2020 | Hebei     | R | 7 | NA   | 212  | 152 | 60  | Chinese |
| 353 | Wang QF  | 2020 | Jiangxi   | P | 7 | 60.1 | 80   | 43  | 37  | Chinese |
| 354 | Li Y     | 2020 | Henan     | P | 6 | 59.8 | 92   | 59  | 33  | Chinese |
| 355 | Hu B     | 2020 | Henan     | P | 6 | 69.1 | 124  | 68  | 56  | Chinese |
| 356 | Xia HY   | 2020 | Fujian    | P | 6 | 51.4 | 68   | 39  | 29  | Chinese |
| 357 | Yi QH    | 2020 | Xinjiang  | R | 6 | NA   | 76   | 53  | 23  | Chinese |
| 358 | Chen Y   | 2021 | Shaanxi   | P | 6 | 56.8 | 150  | 90  | 60  | Chinese |
| 359 | Li FJ    | 2021 | Shandong  | R | 5 | NA   | 364  | 278 | 86  | Chinese |
| 360 | Ding PA  | 2021 | Hebei     | P | 6 | NA   | 1347 | NA  | NA  | Chinese |
| 361 | Ai Y     | 2021 | Fujian    | R | 6 | 59.6 | 65   | 40  | 25  | Chinese |
| 362 | Zheng WJ | 2021 | Fujian    | P | 6 | 60.1 | 80   | 37  | 43  | Chinese |
| 363 | Zhao LP  | 2021 | Zhejiang  | R | 6 | 57.8 | 69   | 43  | 26  | Chinese |
| 364 | Huang WC | 2021 | Fujian    | R | 7 | 64   | 126  | 110 | 16  | Chinese |
| 365 | Gao GM   | 2021 | Jiangxi   | R | 6 | NA   | 1256 | NA  | NA  | Chinese |
| 366 | Wang XD  | 2021 | Qinghai   | P | 6 | 58.3 | 116  | 75  | 41  | Chinese |
| 367 | Ding PA  | 2021 | Hebei     | R | 6 | NA   | 558  | NA  | NA  | Chinese |
| 368 | Huang WC | 2021 | Fujian    | P | 6 | 56.9 | 110  | 59  | 51  | Chinese |
| 369 | He HS    | 2021 | Fujian    | R | 6 | 66.9 | 70   | 37  | 33  | Chinese |
| 370 | Jia YX   | 2021 | Henan     | P | 6 | NA   | 102  | 79  | 23  | Chinese |
| 371 | Lv J     | 2021 | Shaanxi   | R | 6 | 56.8 | 105  | 54  | 51  | Chinese |
| 372 | Fang Z   | 2021 | Shandong  | R | 6 | 65.9 | 183  | 137 | 46  | Chinese |
| 373 | Yuan Y   | 2021 | Shanghai  | P | 6 | NA   | 81   | NA  | NA  | Chinese |
| 374 | Wei SH   | 2021 | Fujian    | R | 6 | 57   | 25   | 19  | 6   | Chinese |
| 375 | Cui H    | 2021 | Beijing   | R | 7 | NA   | 130  | NA  | NA  | Chinese |

|     |          |      |           |   |   |      |      |      |     |         |
|-----|----------|------|-----------|---|---|------|------|------|-----|---------|
| 376 | Li YF    | 2021 | Shaanxi   | P | 6 | 63.4 | 84   | 53   | 31  | Chinese |
| 377 | Du GJ    | 2021 | Shandong  | R | 7 | NA   | 303  | 213  | 90  | Chinese |
| 378 | Zhang J  | 2021 | Jiangsu   | P | 6 | 67.8 | 487  | 378  | 109 | Chinese |
| 379 | Xiao YP  | 2021 | Hunan     | R | 6 | 55.4 | 2029 | 1332 | 697 | Chinese |
| 380 | Kamili   | 2021 | Xinjiang  | P | 6 | 60.2 | 166  | 123  | 43  | Chinese |
| 381 | Han SF   | 2021 | Liaoning  | R | 6 | 63   | 195  | 138  | 57  | Chinese |
| 382 | Li AQ    | 2021 | Anhui     | P | 6 | NA   | 900  | 682  | 218 | Chinese |
| 383 | Zhang Y  | 2021 | Beijing   | P | 6 | 56.4 | 116  | 61   | 55  | Chinese |
| 384 | Ji HY    | 2021 | Jiangsu   | P | 7 | 55.4 | 80   | 46   | 34  | Chinese |
| 385 | Zhang QL | 2021 | Hebei     | R | 6 | 60.3 | 398  | 262  | 136 | Chinese |
| 386 | Zhang GH | 2021 | Sichuan   | R | 6 | 50.9 | 208  | 120  | 88  | Chinese |
| 387 | Ding PA  | 2021 | Hebei     | P | 6 | NA   | 277  | NA   | NA  | Chinese |
| 388 | Ma J     | 2021 | Anhui     | R | 7 | 62.5 | 525  | 387  | 138 | Chinese |
| 389 | Gao B    | 2021 | Liaoning  | P | 5 | 62.1 | 174  | 116  | 58  | Chinese |
| 390 | Fu YN    | 2021 | Liaoning  | R | 6 | NA   | 197  | 103  | 94  | Chinese |
| 391 | Meng N   | 2021 | Hebei     | R | 6 | NA   | 72   | NA   | NA  | Chinese |
| 392 | Li C     | 2021 | Henan     | R | 6 | NA   | 34   | 24   | 10  | Chinese |
| 393 | Huang WB | 2021 | Hubei     | P | 6 | 50.8 | 96   | 68   | 28  | Chinese |
| 394 | Zhang YF | 2021 | Beijing   | R | 6 | 57.2 | 166  | 102  | 64  | Chinese |
| 395 | Tian Y   | 2021 | Hebei     | P | 6 | NA   | 132  | 119  | 13  | Chinese |
| 396 | Wang TB  | 2021 | Beijing   | R | 6 | 55   | 490  | 358  | 132 | Chinese |
| 397 | Chen XM  | 2021 | Ningxia   | P | 6 | NA   | 179  | 112  | 67  | Chinese |
| 398 | Xu L     | 2021 | Sichuan   | P | 6 | 61   | 86   | 48   | 38  | Chinese |
| 399 | Li MZ    | 2021 | Tianjin   | R | 6 | NA   | 68   | 25   | 43  | Chinese |
| 400 | Hu XF    | 2021 | Henan     | R | 7 | NA   | 86   | 38   | 48  | Chinese |
| 401 | Xia L    | 2021 | Anhui     | R | 6 | NA   | 86   | 90   | 26  | Chinese |
| 402 | Ma YW    | 2021 | Gansu     | R | 6 | NA   | 1639 | NA   | NA  | Chinese |
| 403 | Li HZ    | 2021 | Henan     | P | 6 | NA   | 255  | 218  | 37  | Chinese |
| 404 | Ni T     | 2021 | Guangxi   | P | 7 | 62   | 69   | 61   | 8   | Chinese |
| 405 | Wang RJ  | 2021 | Shandong  | P | 8 | NA   | 120  | 86   | 34  | Chinese |
| 406 | Yan Q    | 2021 | Guangdong | R | 7 | NA   | 131  | 100  | 31  | Chinese |
| 407 | Huang ZP | 2021 | Gansu     | P | 6 | NA   | 665  | 509  | 156 | Chinese |
| 408 | Cui WH   | 2021 | Shandong  | P | 7 | NA   | 719  | 514  | 205 | Chinese |
| 409 | Shu HG   | 2021 | Jiangxi   | P | 7 | 61.8 | 44   | 37   | 7   | Chinese |
| 410 | Zhao Y   | 2021 | Shandong  | P | 7 | 61.7 | 223  | 195  | 28  | Chinese |
| 411 | Wang MY  | 2021 | Anhui     | R | 7 | NA   | 40   | 30   | 10  | Chinese |
| 412 | Zhang HY | 2021 | Anhui     | R | 6 | 62.2 | 24   | 20   | 4   | Chinese |
| 413 | Ma S     | 2021 | Liaoning  | R | 7 | NA   | 2526 | NA   | NA  | Chinese |
| 414 | Li GG    | 2021 | Qinghai   | R | 7 | NA   | 156  | NA   | NA  | Chinese |
| 415 | Yang SN  | 2021 | Henan     | P | 7 | NA   | 73   | 51   | 22  | Chinese |
| 416 | Zhu H    | 2021 | Jiangsu   | P | 7 | NA   | 108  | 69   | 39  | Chinese |
| 417 | Zheng H  | 2021 | Anhui     | P | 6 | 60   | 80   | 53   | 27  | Chinese |

|     |          |      |                   |   |   |      |     |     |     |         |
|-----|----------|------|-------------------|---|---|------|-----|-----|-----|---------|
| 418 | Zhang MK | 2021 | Shandong          | R | 6 | 61.9 | 80  | 60  | 20  | Chinese |
| 419 | Cheng J  | 2021 | Hubei             | P | 6 | 48.3 | 70  | 43  | 27  | Chinese |
| 420 | Chen W   | 2021 | Jiangsu           | R | 6 | 42.7 | 120 | 74  | 46  | Chinese |
| 421 | Qi S     | 2021 | Sichuan           | P | 6 | 51.6 | 70  | 59  | 11  | Chinese |
| 422 | Ji SW    | 2021 | Shanxi            | P | 5 | 62.3 | 80  | 47  | 33  | Chinese |
| 423 | Kong XC  | 2021 | Shanghai          | R | 6 | NA   | 147 | NA  | NA  | Chinese |
| 424 | Lin RG   | 2021 | Guangdong         | P | 5 | NA   | 48  | NA  | NA  | Chinese |
| 425 | Wang HM  | 2021 | Shandong          | P | 6 | 61.4 | 104 | 63  | 41  | Chinese |
| 426 | Han S    | 2021 | Hubei             | P | 5 | 47.5 | 82  | 43  | 39  | Chinese |
| 427 | Wang HW  | 2021 | Guangdong         | P | 6 | 56.5 | 60  | 33  | 27  | Chinese |
| 428 | Zhang J  | 2021 | Henan             | R | 6 | 58.2 | 88  | 58  | 30  | Chinese |
| 429 | Wang Z   | 2021 | Anhui             | P | 6 | 64   | 40  | 33  | 7   | Chinese |
| 430 | Chen YJ  | 2021 | Xinjiang          | R | 5 | 66.2 | 36  | 26  | 10  | Chinese |
| 431 | Fu YJ    | 2021 | Shanghai          | R | 6 | 64.2 | 535 | 389 | 146 | Chinese |
| 432 | Xie YY   | 2021 | Inner Mongolia    | P | 6 | 72.2 | 404 | 255 | 149 | Chinese |
| 433 | Meng M   | 2021 | Shandong&Zhejiang | R | 5 | 58.1 | 76  | 46  | 30  | Chinese |
| 434 | Chen ZL  | 2021 | Henan             | P | 6 | 52.5 | 84  | 57  | 27  | Chinese |
| 435 | Ding DQ  | 2021 | Anhui             | P | 7 | 63.7 | 72  | 38  | 34  | Chinese |
| 436 | Han YH   | 2021 | Shandong          | P | 6 | 61.3 | 80  | 48  | 32  | Chinese |
| 437 | Chao LM  | 2021 | Inner Mongolia    | P | 6 | 45.7 | 78  | 44  | 34  | Chinese |
| 438 | Guo YM   | 2021 | Shaanxi           | P | 7 | 52.8 | 183 | 114 | 69  | Chinese |
| 439 | Yu DZ    | 2021 | Hebei             | P | 6 | 65.4 | 83  | 54  | 29  | Chinese |
| 440 | Xiao ZJ  | 2021 | Inner Mongolia    | R | 6 | NA   | 80  | 56  | 24  | Chinese |
| 441 | Yang WB  | 2021 | Hunan             | P | 6 | NA   | 96  | 58  | 38  | Chinese |
| 442 | Zhong XS | 2021 | Guangdong         | P | 6 | 58.6 | 82  | 46  | 36  | Chinese |
| 443 | Li LP    | 2021 | Guangdong         | P | 7 | 49.6 | 97  | 62  | 35  | Chinese |
| 444 | Du CR    | 2021 | Anhui             | P | 6 | 59.1 | 65  | 36  | 29  | Chinese |
| 445 | Miao XW  | 2021 | Shaanxi           | R | 8 | NA   | 636 | 504 | 132 | Chinese |
| 446 | Hu GP    | 2021 | Qinghai           | P | 8 | 57   | 600 | 454 | 146 | Chinese |
| 447 | Liu QQ   | 2021 | Xinjiang          | P | 7 | NA   | 160 | NA  | NA  | Chinese |
| 448 | Zhang ZZ | 2021 | Hebei             | P | 8 | 58.2 | 70  | 54  | 16  | Chinese |
| 449 | Feng S   | 2021 | Anhui             | R | 6 | NA   | 188 | 104 | 84  | Chinese |
| 450 | Tang Q   | 2022 | Hunan             | R | 7 | 51.6 | 385 | 215 | 170 | Chinese |
| 451 | Wang CY  | 2016 | Fujian            | R | 5 | NA   | 65  | 38  | 27  | Chinese |
| 452 | Su HY    | 2016 | Jiangsu           | R | 6 | NA   | 717 | 516 | 201 | Chinese |
| 453 | Yang WY  | 2016 | Shanxi            | R | 7 | 42.4 | 84  | 60  | 24  | Chinese |
| 454 | Yu WW    | 2016 | Gansu             | R | 6 | NA   | 47  | 38  | 9   | Chinese |
| 455 | Liu YL   | 2016 | Beijing           | R | 6 | NA   | 321 | 168 | 153 | Chinese |
| 456 | Zhang Y; | 2016 | Shanghai          | R | 5 | NA   | 128 | 71  | 57  | Chinese |
| 457 | Li XL    | 2016 | Shaanxi           | P | 6 | 58.1 | 116 | 76  | 40  | Chinese |
| 458 | Chen YW  | 2016 | Anhui             | R | 5 | 51.1 | 90  | 56  | 34  | Chinese |
| 459 | Bai JW   | 2016 | Henan             | R | 7 | NA   | 288 | 175 | 113 | Chinese |



|     |          |      |                    |   |   |      |      |      |     |         |
|-----|----------|------|--------------------|---|---|------|------|------|-----|---------|
| 460 | Wang Y;  | 2016 | Sichuan            | R | 6 | 63.3 | 78   | 42   | 36  | Chinese |
| 461 | Zhang H  | 2016 | Henan              | R | 7 | NA   | 94   | 50   | 44  | Chinese |
| 462 | Wang T;  | 2016 | Henan              | R | 6 | NA   | 60   | 46   | 14  | Chinese |
| 463 | Li ZY    | 2016 | Chongqing          | R | 6 | NA   | 678  | 441  | 237 | Chinese |
| 464 | Cao XL   | 2016 | Beijing            | R | 7 | NA   | 63   | 51   | 12  | Chinese |
| 465 | Yang RL  | 2016 | Guangxi            | R | 6 | NA   | 130  | 81   | 49  | Chinese |
| 466 | NA       | 2016 | Guangdong&Xinjiang | R | 6 | NA   | 45   | NA   | NA  | Chinese |
| 467 | Song ZY  | 2016 | Jilin              | R | 7 | NA   | 788  | 593  | 195 | Chinese |
| 468 | Cheng YL | 2016 | Liaoning           | R | 7 | 57   | 610  | 426  | 184 | Chinese |
| 469 | Li LS    | 2016 | Gansu              | P | 7 | NA   | 413  | 299  | 114 | Chinese |
| 470 | Jin X;   | 2016 | Shaanxi            | R | 6 | 54.5 | 280  | 181  | 99  | Chinese |
| 471 | Yu WW    | 2016 | Jiangsu            | P | 6 | NA   | 64   | 43   | 21  | Chinese |
| 472 | You XL   | 2016 | Jiangsu            | R | 7 | NA   | 126  | 87   | 39  | Chinese |
| 473 | Zhuo CY  | 2016 | heilongjiang       | R | 7 | 58.2 | 395  | 303  | 92  | Chinese |
| 474 | Guo P;   | 2016 | Hubei              | P | 5 | NA   | 76   | 53   | 23  | Chinese |
| 475 | Li C;    | 2016 | Zhejiang           | P | 7 | NA   | 120  | 68   | 52  | Chinese |
| 476 | Yang J;  | 2016 | Gansu              | R | 6 | NA   | 287  | 227  | 60  | Chinese |
| 477 | Su ZR    | 2016 | Anhui              | R | 6 | NA   | 61   | 42   | 19  | Chinese |
| 478 | Zhao TP  | 2016 | Gansu              | P | 7 | NA   | 42   | 26   | 16  | Chinese |
| 479 | Li JW    | 2016 | Henan              | P | 5 | NA   | 68   | 41   | 27  | Chinese |
| 480 | Xu J;    | 2016 | Hubei              | R | 5 | 56   | 86   | 50   | 36  | Chinese |
| 481 | Guo YN   | 2016 | Tianjin            | R | 6 | NA   | 64   | 50   | 14  | Chinese |
| 482 | Xu YW    | 2016 | Fujian             | P | 6 | NA   | 62   | 31   | 31  | Chinese |
| 483 | Zhao YY  | 2016 | Liaoning           | R | 8 | 58.3 | 505  | 369  | 136 | Chinese |
| 484 | Xie WL   | 2016 | Jiangxi            | R | 6 | NA   | 18   | 13   | 5   | Chinese |
| 485 | Zhang Y; | 2016 | Beijing            | R | 6 | NA   | 144  | NA   | NA  | Chinese |
| 486 | Ma WQ    | 2016 | Hebei              | P | 7 | NA   | 130  | 104  | 26  | Chinese |
| 487 | Tan M    | 2016 | Hebei              | P | 8 | 57.2 | 140  | 108  | 32  | Chinese |
| 488 | Xu WZ    | 2016 | Hebei              | P | 7 | NA   | 80   | 50   | 30  | Chinese |
| 489 | Qiu H    | 2016 | Guangxi            | R | 7 | 56.8 | 257  | 178  | 79  | Chinese |
| 490 | Zhang YL | 2016 | Jiangsu            | R | 6 | NA   | 131  | 69   | 62  | Chinese |
| 491 | Zou ZY   | 2016 | Beijing            | R | 7 | NA   | 245  | 160  | 85  | Chinese |
| 492 | Yang AG  | 2016 | Fujian             | R | 6 | NA   | 39   | NA   | NA  | Chinese |
| 493 | Hu JJ    | 2016 | Sichuan            | R | 7 | NA   | 73   | 42   | 31  | Chinese |
| 494 | Shen XY  | 2016 | Liaoning           | P | 6 | NA   | 108  | 61   | 47  | Chinese |
| 495 | Geng W   | 2016 | Jiangsu            | R | 7 | NA   | 46   | 36   | 10  | Chinese |
| 496 | Wang HY  | 2016 | Hubei              | R | 6 | NA   | 80   | 51   | 29  | Chinese |
| 497 | Shang YC | 2016 | Shaanxi            | P | 6 | NA   | 90   | 60   | 30  | Chinese |
| 498 | Zhong JF | 2016 | Shanxi             | P | 6 | NA   | 76   | 49   | 27  | Chinese |
| 499 | Zhu CC   | 2016 | Shanghai           | R | 6 | 62.2 | 3121 | 2125 | 996 | Chinese |
| 500 | Li DY    | 2016 | Guangdong          | R | 6 | 58.7 | 119  | 73   | 46  | Chinese |
| 501 | Xia QY   | 2016 | Jiangsu            | P | 5 | 54.5 | 48   | 29   | 19  | Chinese |

|     |          |      |              |   |   |      |     |     |     |         |
|-----|----------|------|--------------|---|---|------|-----|-----|-----|---------|
| 502 | Xuan ZQ  | 2017 | Jiangsu      | R | 6 | NA   | 105 | 63  | 42  | Chinese |
| 503 | Zhang MY | 2017 | Liaoning     | R | 7 | 60.5 | 150 | 85  | 65  | Chinese |
| 504 | Yang T;  | 2017 | Fujian       | R | 6 | NA   | 55  | 26  | 29  | Chinese |
| 505 | Ge XS    | 2017 | Jiangsu      | R | 7 | NA   | 76  | 63  | 13  | Chinese |
| 506 | Kong XJ  | 2017 | Shanghai     | R | 8 | 60.2 | 273 | 184 | 89  | Chinese |
| 507 | Qi C     | 2017 | Shandong     | R | 7 | 56   | 61  | 43  | 18  | Chinese |
| 508 | Xu HL    | 2017 | Hubei        | P | 6 | 47.2 | 60  | 38  | 22  | Chinese |
| 509 | Zhou HF  | 2017 | Zhejiang     | R | 6 | NA   | 436 | 311 | 125 | Chinese |
| 510 | Mi HN    | 2017 | Gansu        | R | 7 | NA   | 117 | 82  | 35  | Chinese |
| 511 | He X     | 2017 | Jiangsu      | R | 8 | NA   | 72  | 44  | 28  | Chinese |
| 512 | Xie LH   | 2017 | Guangdong    | P | 6 | NA   | 62  | 38  | 24  | Chinese |
| 513 | Han LL   | 2017 | Henan        | P | 5 | 44.5 | 168 | 120 | 48  | Chinese |
| 514 | Ba N;    | 2017 | Henan        | P | 6 | 52.8 | 106 | 59  | 47  | Chinese |
| 515 | Zhu XQ   | 2017 | Jiangsu      | R | 7 | NA   | 98  | 82  | 16  | Chinese |
| 516 | Dou HM   | 2017 | Jiangsu      | R | 5 | 57   | 160 | 71  | 89  | Chinese |
| 517 | Lu LH    | 2017 | Jiangsu      | R | 6 | NA   | 60  | 36  | 24  | Chinese |
| 518 | Zhong LX | 2017 | Fujian       | R | 5 | 71.2 | 68  | 35  | 33  | Chinese |
| 519 | Jiang XM | 2017 | Zhejiang     | P | 6 | NA   | 110 | 88  | 22  | Chinese |
| 520 | Zhou JJ  | 2017 | Zhejiang     | P | 7 | NA   | 426 | 282 | 144 | Chinese |
| 521 | Jiang WH | 2017 | Jiangsu      | P | 7 | NA   | 44  | 27  | 17  | Chinese |
| 522 | Liao HH  | 2017 | Hunan        | P | 6 | 58.1 | 64  | 43  | 21  | Chinese |
| 523 | Zheng YT | 2017 | Henan        | P | 6 | NA   | 72  | 40  | 32  | Chinese |
| 524 | Li X;    | 2017 | Beijing      | P | 7 | NA   | 108 | 57  | 49  | Chinese |
| 525 | Wei QW   | 2017 | Hubei        | R | 6 | NA   | 136 | 75  | 61  | Chinese |
| 526 | Yu M;    | 2017 | Zhejiang     | R | 7 | NA   | 338 | NA  | NA  | Chinese |
| 527 | Cheng YS | 2017 | Anhui        | R | 7 | NA   | 107 | 86  | 21  | Chinese |
| 528 | Yu WW    | 2017 | Gansu        | R | 7 | 75.8 | 33  | NA  | NA  | Chinese |
| 529 | Wang XJ  | 2017 | Fujian       | P | 6 | NA   | 85  | 47  | 38  | Chinese |
| 530 | Wang BY  | 2017 | Jiangsu      | R | 7 | NA   | 109 | 82  | 27  | Chinese |
| 531 | Su L;    | 2017 | Gansu        | R | 6 | NA   | 95  | NA  | NA  | Chinese |
| 532 | Zhou T;  | 2017 | Shandong     | R | 6 | NA   | 114 | 94  | 20  | Chinese |
| 533 | Niu ST   | 2017 | Henan        | R | 6 | 52.7 | 58  | 31  | 27  | Chinese |
| 534 | Zhan RY  | 2017 | Sichuan      | P | 5 | NA   | 60  | 35  | 25  | Chinese |
| 535 | He Y     | 2017 | Henan        | P | 6 | NA   | 96  | 53  | 43  | Chinese |
| 536 | Zhang X; | 2017 | heilongjiang | P | 8 | NA   | 255 | 181 | 74  | Chinese |
| 537 | Hu SB    | 2017 | Beijing      | R | 8 | NA   | 87  | 66  | 21  | Chinese |
| 538 | Zhang MJ | 2017 | Henan        | P | 6 | 59.5 | 42  | NA  | NA  | Chinese |
| 539 | He ZR    | 2017 | Hubei        | R | 5 | NA   | 50  | 27  | 23  | Chinese |
| 540 | Ren H    | 2017 | Beijing      | R | 7 | 62.1 | 95  | 80  | 15  | Chinese |
| 541 | Song JW  | 2017 | heilongjiang | R | 6 | NA   | 115 | NA  | NA  | Chinese |
| 542 | Zhang SB | 2017 | Shaanxi      | P | 7 | NA   | 120 | 54  | 66  | Chinese |
| 543 | She XC   | 2017 | Guangdong    | P | 6 | NA   | 36  | 21  | 15  | Chinese |

|     |          |      |              |   |   |      |      |     |     |         |
|-----|----------|------|--------------|---|---|------|------|-----|-----|---------|
| 544 | Dong QF  | 2017 | Zhejiang     | R | 6 | NA   | 60   | 33  | 27  | Chinese |
| 545 | Zhang F; | 2017 | Sichuan      | P | 6 | NA   | 116  | 69  | 47  | Chinese |
| 546 | Hu JW    | 2017 | Henan        | R | 6 | 60.5 | 298  | 226 | 72  | Chinese |
| 547 | Peng WX  | 2017 | Anhui        | R | 7 | 61.4 | 290  | 178 | 52  | Chinese |
| 548 | Song Z;  | 2017 | Henan        | R | 7 | NA   | 78   | 62  | 16  | Chinese |
| 549 | Chen LC  | 2017 | Fujian       | R | 7 | NA   | 1629 | NA  | NA  | Chinese |
| 550 | Wang JB  | 2017 | Fujian       | R | 7 | NA   | 1568 | NA  | NA  | Chinese |
| 551 | Chen ZP  | 2017 | Fujian       | R | 7 | NA   | 86   | 49  | 37  | Chinese |
| 552 | Yang AF  | 2017 | Henan        | P | 6 | NA   | 80   | 47  | 33  | Chinese |
| 553 | Gao XY   | 2017 | Fujian       | P | 6 | NA   | 123  | 74  | 49  | Chinese |
| 554 | Zhang X; | 2017 | heilongjiang | P | 6 | NA   | 255  | 181 | 74  | Chinese |
| 555 | Li ZQ    | 2017 | Shandong     | R | 8 | 56.2 | 275  | 202 | 73  | Chinese |
| 556 | Hu X;    | 2017 | Sichuan      | R | 7 | 58.3 | 143  | 98  | 45  | Chinese |
| 557 | Sun XZ   | 2017 | Tianjin      | R | 5 | 63.1 | 800  | 472 | 328 | Chinese |
| 558 | Zhou B   | 2017 | Henan        | P | 6 | NA   | 114  | 69  | 45  | Chinese |
| 559 | Shi XJ   | 2017 | Jiangsu      | R | 6 | NA   | 46   | NA  | NA  | Chinese |
| 560 | Shen GJ  | 2017 | Zhejiang     | R | 6 | 60   | 73   | 52  | 21  | Chinese |
| 561 | Li L     | 2017 | Liaoning     | P | 7 | NA   | 160  | 86  | 74  | Chinese |
| 562 | Huang QX | 2017 | Shanxi       | R | 6 | NA   | 142  | NA  | NA  | Chinese |
| 563 | Li SW    | 2017 | Jiangsu      | R | 7 | NA   | 77   | NA  | NA  | Chinese |
| 564 | Lin CZ   | 2017 | Fujian       | R | 7 | NA   | 94   | 69  | 25  | Chinese |
| 565 | Shen Y   | 2017 | Fujian       | R | 8 | NA   | 259  | NA  | NA  | Chinese |
| 566 | Liang P; | 2017 | Liaoning     | P | 8 | 55   | 50   | 31  | 19  | Chinese |
| 567 | Du XC    | 2017 | Henan        | R | 7 | NA   | 64   | 41  | 23  | Chinese |
| 568 | Yuan QQ  | 2017 | Anhui        | R | 7 | 60   | 276  | 213 | 63  | Chinese |
| 569 | Wang FB  | 2017 | Jiangsu      | P | 6 | NA   | 100  | 68  | 32  | Chinese |
| 570 | Jia TY   | 2017 | Henan        | R | 7 | NA   | 100  | 58  | 42  | Chinese |
| 571 | Wang HR  | 2017 | Shandong     | R | 6 | NA   | 60   | NA  | NA  | Chinese |
| 572 | Gu T     | 2017 | Zhejiang     | R | 7 | NA   | 60   | NA  | NA  | Chinese |
| 573 | Li XY    | 2017 | Zhejiang     | R | 7 | 62.5 | 120  | 92  | 28  | Chinese |
| 574 | Wang F   | 2017 | Henan        | R | 6 | NA   | 94   | 57  | 37  | Chinese |
| 575 | Peng Q;  | 2017 | Fujian       | P | 6 | NA   | 48   | 33  | 15  | Chinese |
| 576 | Yao Q;   | 2018 | Jiangsu      | R | 6 | 73.8 | 146  | 79  | 67  | Chinese |
| 577 | Tang J;  | 2018 | Hunan        | R | 5 | 55   | 115  | 66  | 49  | Chinese |
| 578 | Li M     | 2018 | Jiangxi      | P | 7 | NA   | 186  | 130 | 56  | Chinese |
| 579 | Yu WB    | 2018 | Fujian       | R | 7 | 59.6 | 54   | 46  | 8   | Chinese |
| 580 | Liu Y    | 2018 | Jiangxi      | R | 7 | 60   | 247  | 169 | 51  | Chinese |
| 581 | Cao YX   | 2018 | Jiangsu      | R | 8 | NA   | 163  | 116 | 47  | Chinese |
| 582 | Hao LJ   | 2018 | Shandong     | P | 7 | 63.5 | 38   | 21  | 17  | Chinese |
| 583 | Fu L     | 2018 | Henan        | R | 7 | NA   | 62   | 41  | 21  | Chinese |
| 584 | Zhao WF  | 2018 | Henan        | P | 7 | NA   | 96   | 55  | 41  | Chinese |
| 585 | Zhou ZW  | 2018 | Anhui        | R | 6 | 61.6 | 117  | 84  | 33  | Chinese |

|     |          |      |              |   |   |      |      |      |      |         |
|-----|----------|------|--------------|---|---|------|------|------|------|---------|
| 586 | Zhang HL | 2018 | Zhejiang     | R | 6 | NA   | 940  | 667  | 273  | Chinese |
| 587 | Yao ZD   | 2018 | Beijing      | R | 6 | NA   | 188  | 141  | 47   | Chinese |
| 588 | Chen ZX  | 2018 | Jiangxi      | P | 6 | NA   | 75   | 57   | 18   | Chinese |
| 589 | Zhang KC | 2018 | Beijing      | R | 8 | NA   | 140  | NA   | NA   | Chinese |
| 590 | Li M;    | 2018 | Qinghai      | P | 7 | NA   | 92   | 53   | 39   | Chinese |
| 591 | Guo MK   | 2018 | Anhui        | P | 6 | NA   | 62   | 38   | 24   | Chinese |
| 592 | Jia JR   | 2018 | Hubei        | R | 8 | 58.6 | 90   | 66   | 24   | Chinese |
| 593 | Yu H     | 2018 | Jiangsu      | R | 6 | NA   | 42   | 29   | 13   | Chinese |
| 594 | Lin DJ   | 2018 | Fujian       | R | 5 | 58.3 | 183  | 121  | 62   | Chinese |
| 595 | Zheng ZG | 2018 | Fujian       | P | 6 | NA   | 78   | 45   | 33   | Chinese |
| 596 | Zhao YH  | 2018 | Gansu        | R | 5 | NA   | 52   | 27   | 25   | Chinese |
| 597 | Ye LL    | 2018 | Anhui        | R | 8 | NA   | 64   | 43   | 21   | Chinese |
| 598 | Shang DF | 2018 | Henan        | P | 8 | NA   | 96   | 66   | 30   | Chinese |
| 599 | Zhang XJ | 2018 | Jiangsu      | R | 6 | NA   | 80   | 33   | 47   | Chinese |
| 600 | Xie YR   | 2018 | Hubei        | R | 7 | NA   | 100  | 56   | 44   | Chinese |
| 601 | Xiao R   | 2018 | Fujian       | R | 7 | NA   | 74   | NA   | NA   | Chinese |
| 602 | Shang L; | 2018 | Shaanxi      | R | 5 | NA   | 469  | 360  | 109  | Chinese |
| 603 | Zhu H;   | 2018 | Anhui        | R | 6 | NA   | 1700 | NA   | NA   | Chinese |
| 604 | Cheng HF | 2018 | Guangxi      | R | 8 | 58.3 | 144  | 101  | 43   | Chinese |
| 605 | Bai BL   | 2018 | Zhejiang     | P | 7 | 63.8 | 182  | 138  | 44   | Chinese |
| 606 | Zhao YB  | 2018 | Liaoning     | P | 6 | NA   | 60   | 43   | 17   | Chinese |
| 607 | Wang HH  | 2018 | Liaoning     | P | 8 | 51   | 50   | 32   | 18   | Chinese |
| 608 | Song CJ  | 2018 | Jiangsu      | R | 5 | 62.4 | 102  | NA   | NA   | Chinese |
| 609 | Zhou H;  | 2018 | Jiangsu      | R | 6 | NA   | 147  | 107  | 40   | Chinese |
| 610 | Chang N  | 2018 | Henan        | R | 7 | 55.5 | 180  | 109  | 71   | Chinese |
| 611 | Liu CC   | 2018 | Anhui        | R | 5 | 58.6 | 42   | 32   | 10   | Chinese |
| 612 | Wang Y   | 2018 | Hebei        | R | 7 | NA   | 106  | 68   | 38   | Chinese |
| 613 | Wei ZJ   | 2018 | Anhui        | R | 6 | NA   | 198  | NA   | NA   | Chinese |
| 614 | Ji ZH    | 2018 | Beijing      | P | 7 | NA   | 110  | 52   | 58   | Chinese |
| 615 | Wang SC  | 2018 | Shanghai     | P | 7 | 62.2 | 4311 | 2942 | 1369 | Chinese |
| 616 | Ji W     | 2018 | Beijing      | P | 7 | NA   | 26   | NA   | NA   | Chinese |
| 617 | Li RD    | 2018 | Jilin        | P | 6 | NA   | 181  | 145  | 36   | Chinese |
| 618 | Nie L;   | 2018 | Fujian       | P | 7 | NA   | 60   | 37   | 23   | Chinese |
| 619 | Chen LC  | 2018 | Fujian       | R | 7 | 58.9 | 1801 | 1292 | 509  | Chinese |
| 620 | Qu AY    | 2018 | Liaoning     | P | 6 | 68.1 | 44   | 31   | 13   | Chinese |
| 621 | Di HF    | 2018 | Hebei        | R | 6 | NA   | 90   | 52   | 38   | Chinese |
| 622 | Sun SQ   | 2018 | HeiLongJiang | P | 8 | NA   | 80   | 45   | 35   | Chinese |
| 623 | Wang HB  | 2018 | Chongqing    | P | 6 | NA   | 60   | 33   | 27   | Chinese |
| 624 | Zhang LX | 2018 | Anhui        | R | 8 | NA   | 132  | 106  | 26   | Chinese |
| 625 | Wang L   | 2018 | Liaoning     | R | 8 | NA   | 73   | 51   | 22   | Chinese |
| 626 | Gao P;   | 2018 | Jiangxi      | R | 7 | NA   | 80   | 58   | 22   | Chinese |
| 627 | Wang C   | 2018 | Shandong     | R | 7 | NA   | 95   | 65   | 30   | Chinese |

|     |          |      |           |   |   |      |      |      |     |         |
|-----|----------|------|-----------|---|---|------|------|------|-----|---------|
| 628 | Song YJ  | 2018 | Hubei     | P | 7 | NA   | 107  | 69   | 38  | Chinese |
| 629 | Zhang YX | 2018 | Henan     | R | 6 | NA   | 113  | 66   | 47  | Chinese |
| 630 | Wang HX  | 2018 | Shaanxi   | P | 6 | NA   | 77   | 57   | 20  | Chinese |
| 631 | Li JL    | 2018 | Shanxi    | R | 6 | NA   | 60   | 36   | 24  | Chinese |
| 632 | Wang Y   | 2018 | Tianjin   | R | 6 | NA   | 142  | 101  | 41  | Chinese |
| 633 | Wang MK  | 2018 | Guizhou   | R | 7 | 55.9 | 85   | 57   | 28  | Chinese |
| 634 | Yang L;  | 2018 | Shaanxi   | R | 6 | NA   | 120  | 71   | 49  | Chinese |
| 635 | Liu F    | 2018 | Jilin     | P | 6 | NA   | 98   | 53   | 45  | Chinese |
| 636 | Zhang HQ | 2018 | Shaanxi   | R | 8 | NA   | 128  | NA   | NA  | Chinese |
| 637 | Cai FB   | 2018 | Fujian    | R | 7 | NA   | 128  | 96   | 32  | Chinese |
| 638 | Yang JF  | 2018 | Henan     | P | 6 | NA   | 56   | 39   | 17  | Chinese |
| 639 | Zhu SY   | 2018 | Zhejiang  | P | 6 | NA   | 60   | 23   | 37  | Chinese |
| 640 | Tian H   | 2018 | Liaoning  | R | 6 | NA   | 96   | NA   | NA  | Chinese |
| 641 | Yao GY   | 2018 | Zhejiang  | P | 6 | NA   | 86   | 52   | 34  | Chinese |
| 642 | Bi LQ    | 2018 | Jiangsu   | R | 6 | NA   | 70   | 39   | 31  | Chinese |
| 643 | Yu WB    | 2018 | Fujian    | P | 7 | 59.6 | 54   | 46   | 8   | Chinese |
| 644 | Liu JS   | 2018 | Shaanxi   | R | 6 | 57.5 | 79   | 68   | 11  | Chinese |
| 645 | Wei GB   | 2018 | Shaanxi   | R | 5 | NA   | 98   | NA   | NA  | Chinese |
| 646 | You YZ   | 2018 | Guangdong | P | 7 | NA   | 153  | NA   | NA  | Chinese |
| 647 | Liao L;  | 2018 | Hunan     | R | 6 | NA   | 94   | 61   | 33  | Chinese |
| 648 | He J;    | 2018 | Sichuan   | R | 6 | NA   | 100  | 51   | 49  | Chinese |
| 649 | Yin TS   | 2018 | Sichuan   | R | 6 | NA   | 70   | 38   | 32  | Chinese |
| 650 | Qu YL    | 2019 | Xinjiang  | R | 5 | 43   | 29   | 0    | 29  | Chinese |
| 651 | Sai FD   | 2019 | Xinjiang  | R | 5 | 59.8 | 42   | 28   | 14  | Chinese |
| 652 | Deng WF  | 2019 | Guangdong | P | 6 | NA   | 50   | 29   | 21  | Chinese |
| 653 | Wei XB   | 2019 | Guangxi   | R | 5 | NA   | 102  | 63   | 39  | Chinese |
| 654 | Li ZG    | 2019 | Anhui     | R | 6 | NA   | 39   | 24   | 15  | Chinese |
| 655 | Guo YT   | 2019 | Shanxi    | R | 7 | NA   | 183  | 115  | 68  | Chinese |
| 656 | Zhou RJ  | 2019 | Shanghai  | R | 6 | 61   | 278  | 207  | 74  | Chinese |
| 657 | Nie HJ   | 2019 | Henan     | R | 6 | NA   | 89   | 52   | 37  | Chinese |
| 658 | Liu LJ   | 2019 | Hainan    | R | 6 | NA   | 312  | 217  | 95  | Chinese |
| 659 | Xu ZP    | 2019 | Jiangsu   | P | 6 | NA   | 404  | NA   | NA  | Chinese |
| 660 | Yang Y;  | 2019 | Beijing   | P | 6 | NA   | 3241 | 2363 | 878 | Chinese |
| 661 | Du J;    | 2019 | Hubei     | R | 5 | NA   | 104  | 62   | 42  | Chinese |
| 662 | Luo R;   | 2019 | Liaoning  | R | 5 | 56.2 | 50   | 38   | 12  | Chinese |
| 663 | Lin JX   | 2019 | Fujian    | R | 6 | NA   | 4250 | NA   | NA  | Chinese |
| 664 | Zhi ZY   | 2019 | Henan     | R | 7 | NA   | 268  | NA   | NA  | Chinese |

P, prospective study; R, retrospective study; NA, not available

**Table S5** Pooled survival rates (%) and 95% CIs of gastric cancer in four time periods

| Survival | 2000-2005 |                 | 2006-2010 |                 | 2011-2015 |                 | 2016-2022 |                 |
|----------|-----------|-----------------|-----------|-----------------|-----------|-----------------|-----------|-----------------|
|          | N         | SR (95% CI)     | N         | SR (95% CI)     | N         | SR (95% CI)     | N         | SR (95% CI)     |
| 1-year   | 33        | 76.8(71.5-82.1) | 67        | 77.9(75.0-80.9) | 139       | 75.5(73.2-77.7) | 130       | 73.7(71.1-76.3) |
| 2-year   | 12        | 48.8(34.5-63.1) | 20        | 54.5(43.8-65.3) | 73        | 57.2(50.3-64.1) | 67        | 52.1(44.9-59.4) |
| 3-year   | 36        | 49.3(41.5-57.1) | 67        | 49.9(43.7-56.2) | 143       | 54.3(49.1-59.5) | 92        | 56.0(50.9-61.0) |
| 5-year   | 51        | 44.5(38.2-50.8) | 83        | 37.7(33.5-41.9) | 115       | 45.9(41.5-50.3) | 46        | 53.1(44.8-61.4) |

N, numbers of included studies; SR, survival rate; CI, confidence interval.

[Supplementary figures]

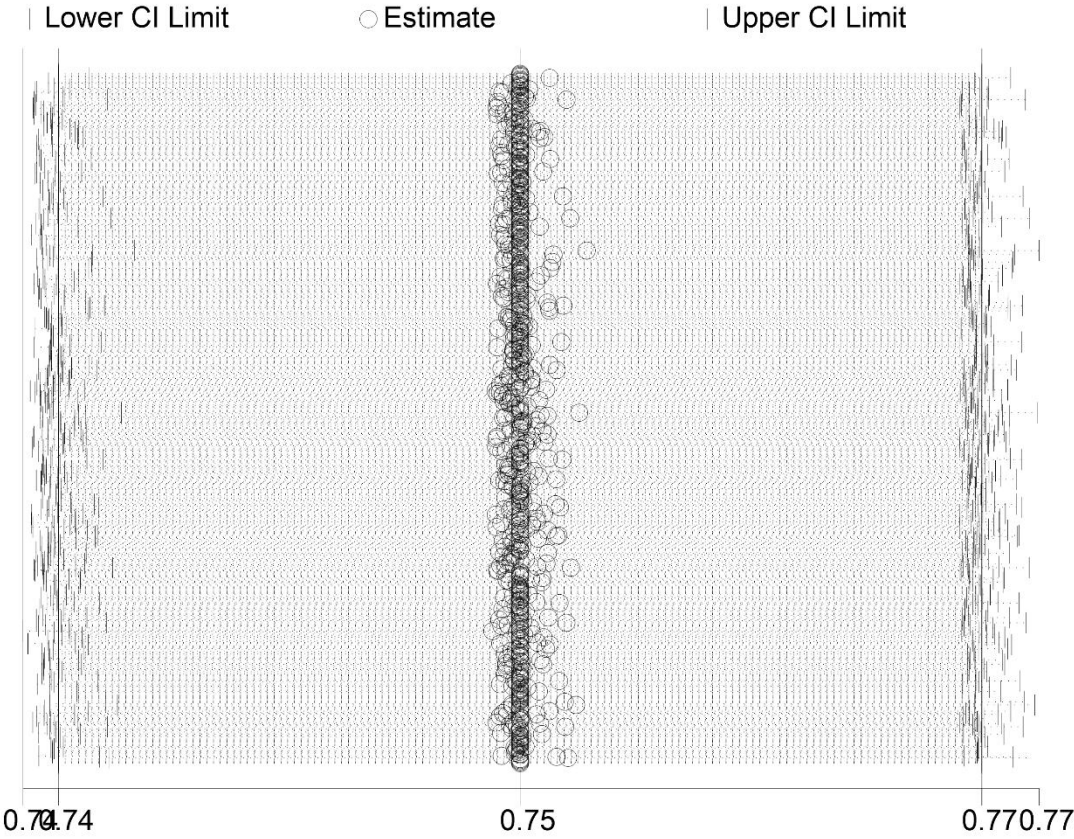

Figure S1 Sensitivity analysis for meta-analysis of one-year survival

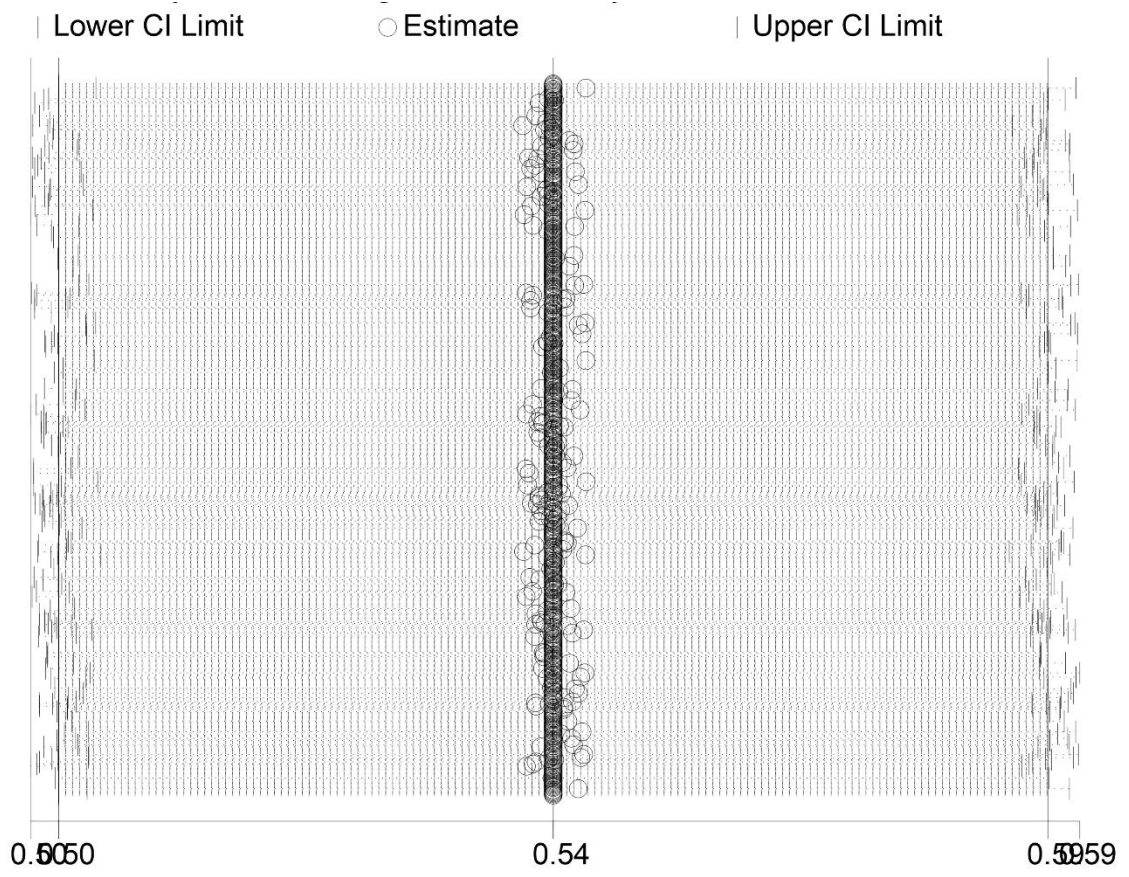

**Figure S2** Sensitivity analysis for meta-analysis of two-year survival



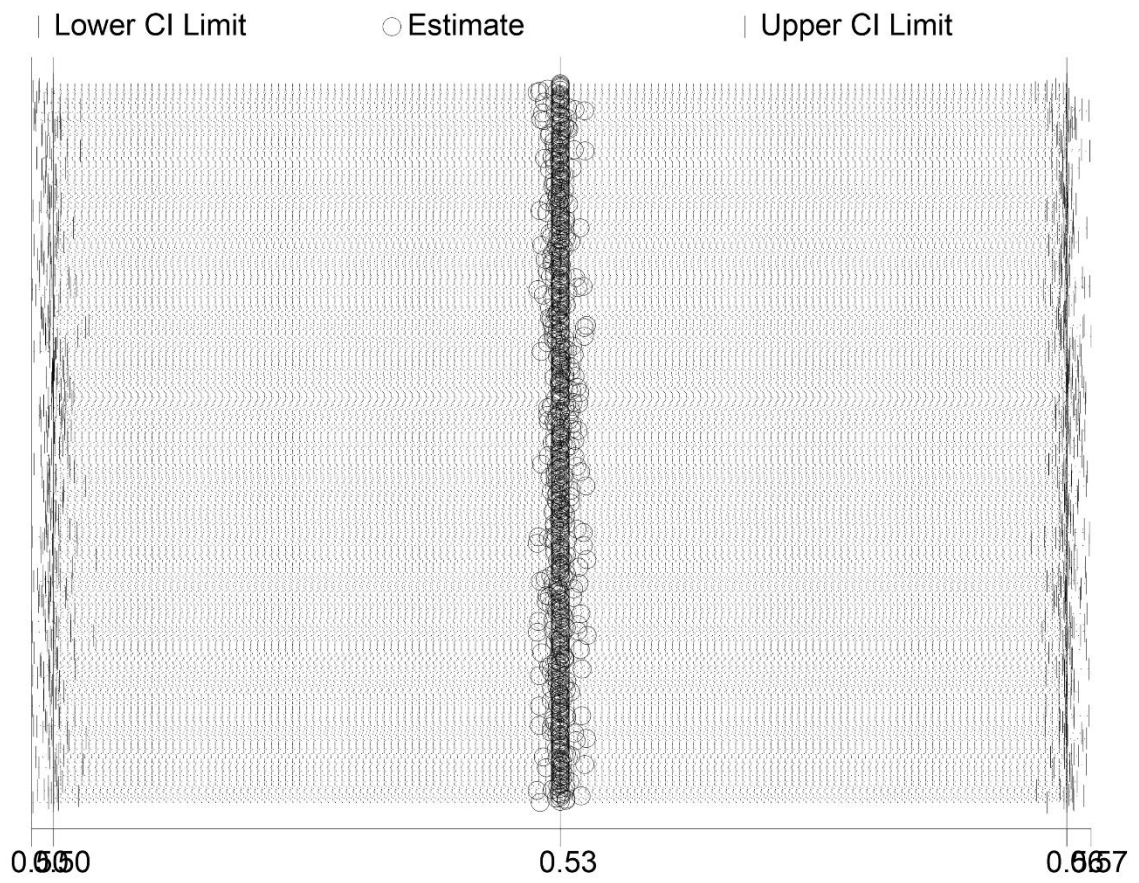

**Figure S3** Sensitivity analysis for meta-analysis of three-year survival

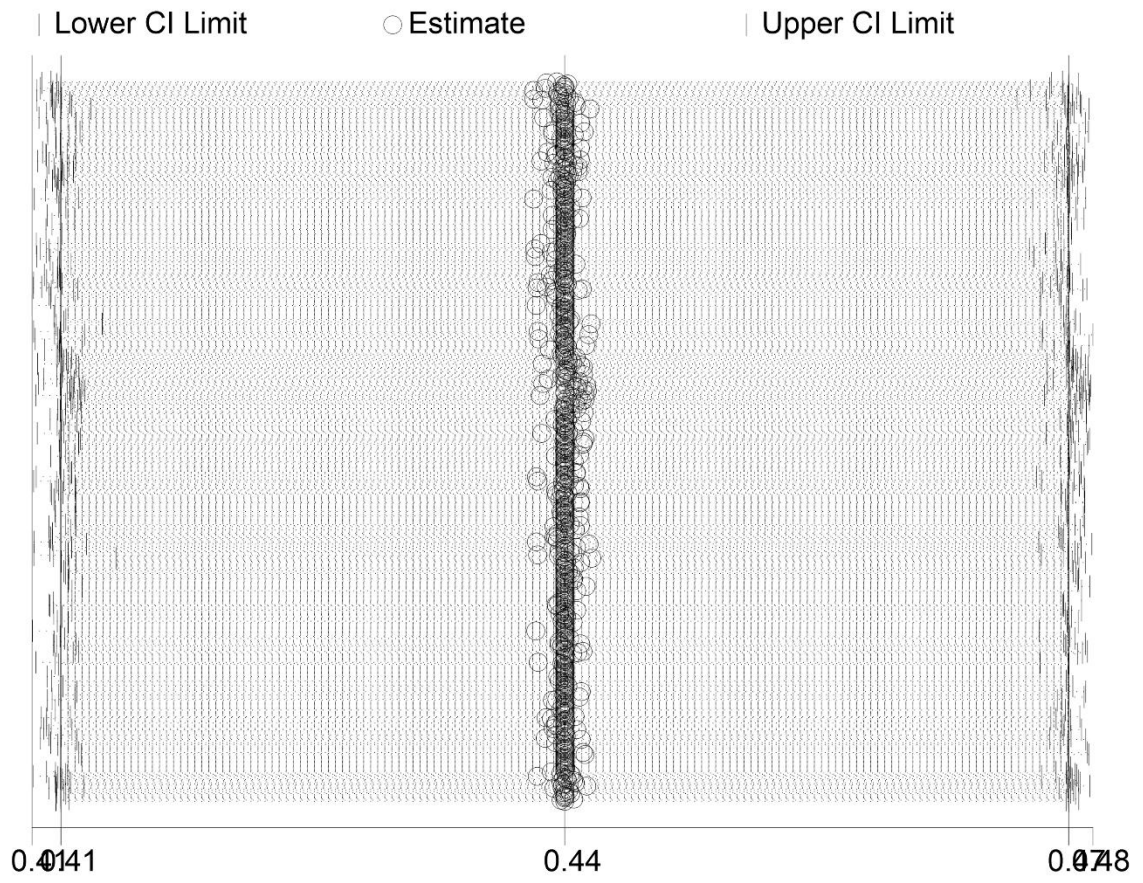

**Figure S4** Sensitivity analysis for meta-analysis of five-year survival

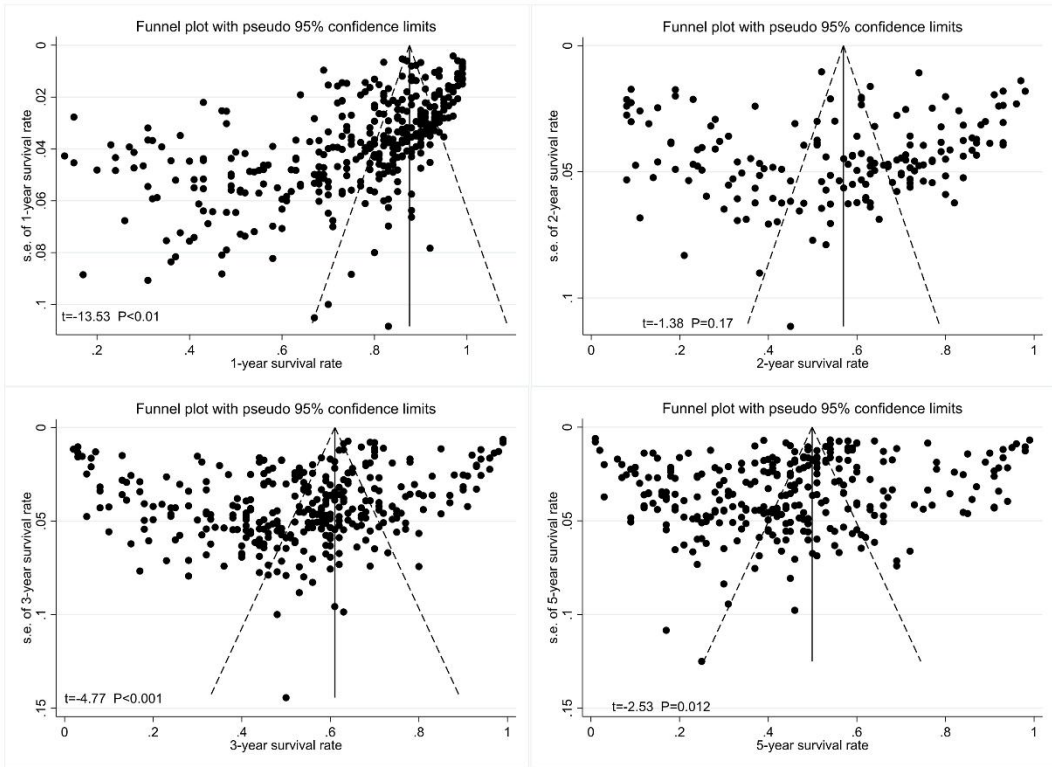

Figure S5 Funnel plots of publication bias analyses
